# Supplementary material
Source: publisher site journal article supplement (https://www.dovepress.com/article/438278)
Supplement: Supplementary file 1 [file get_supplementary_file.php]

**Supplementary Material**

**
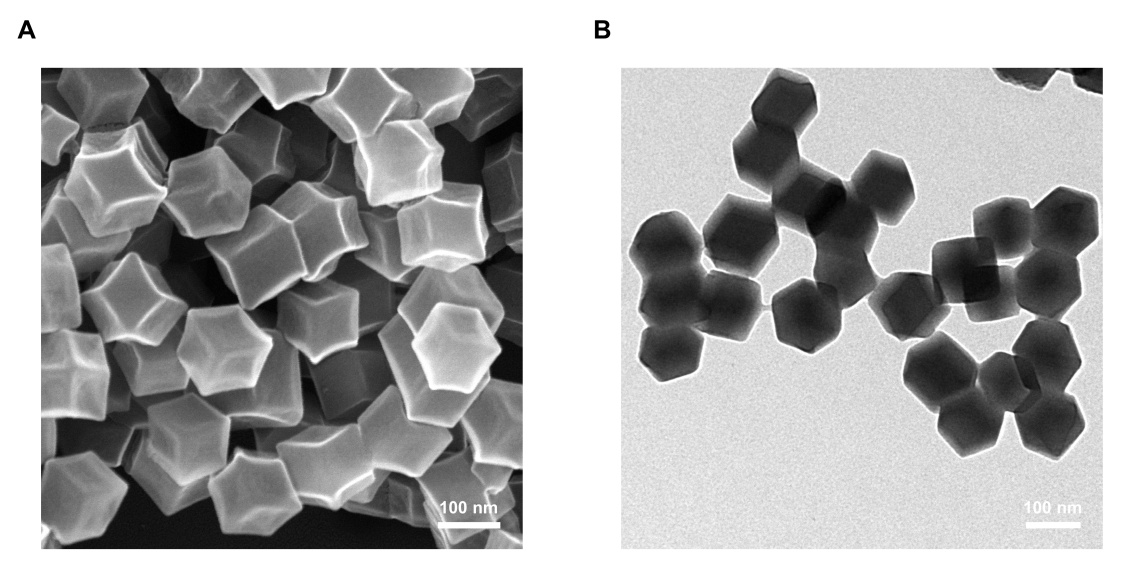
**

**Figure S1.** (A) SEM and (B) TEM images of Mo-ZIF-8.

**
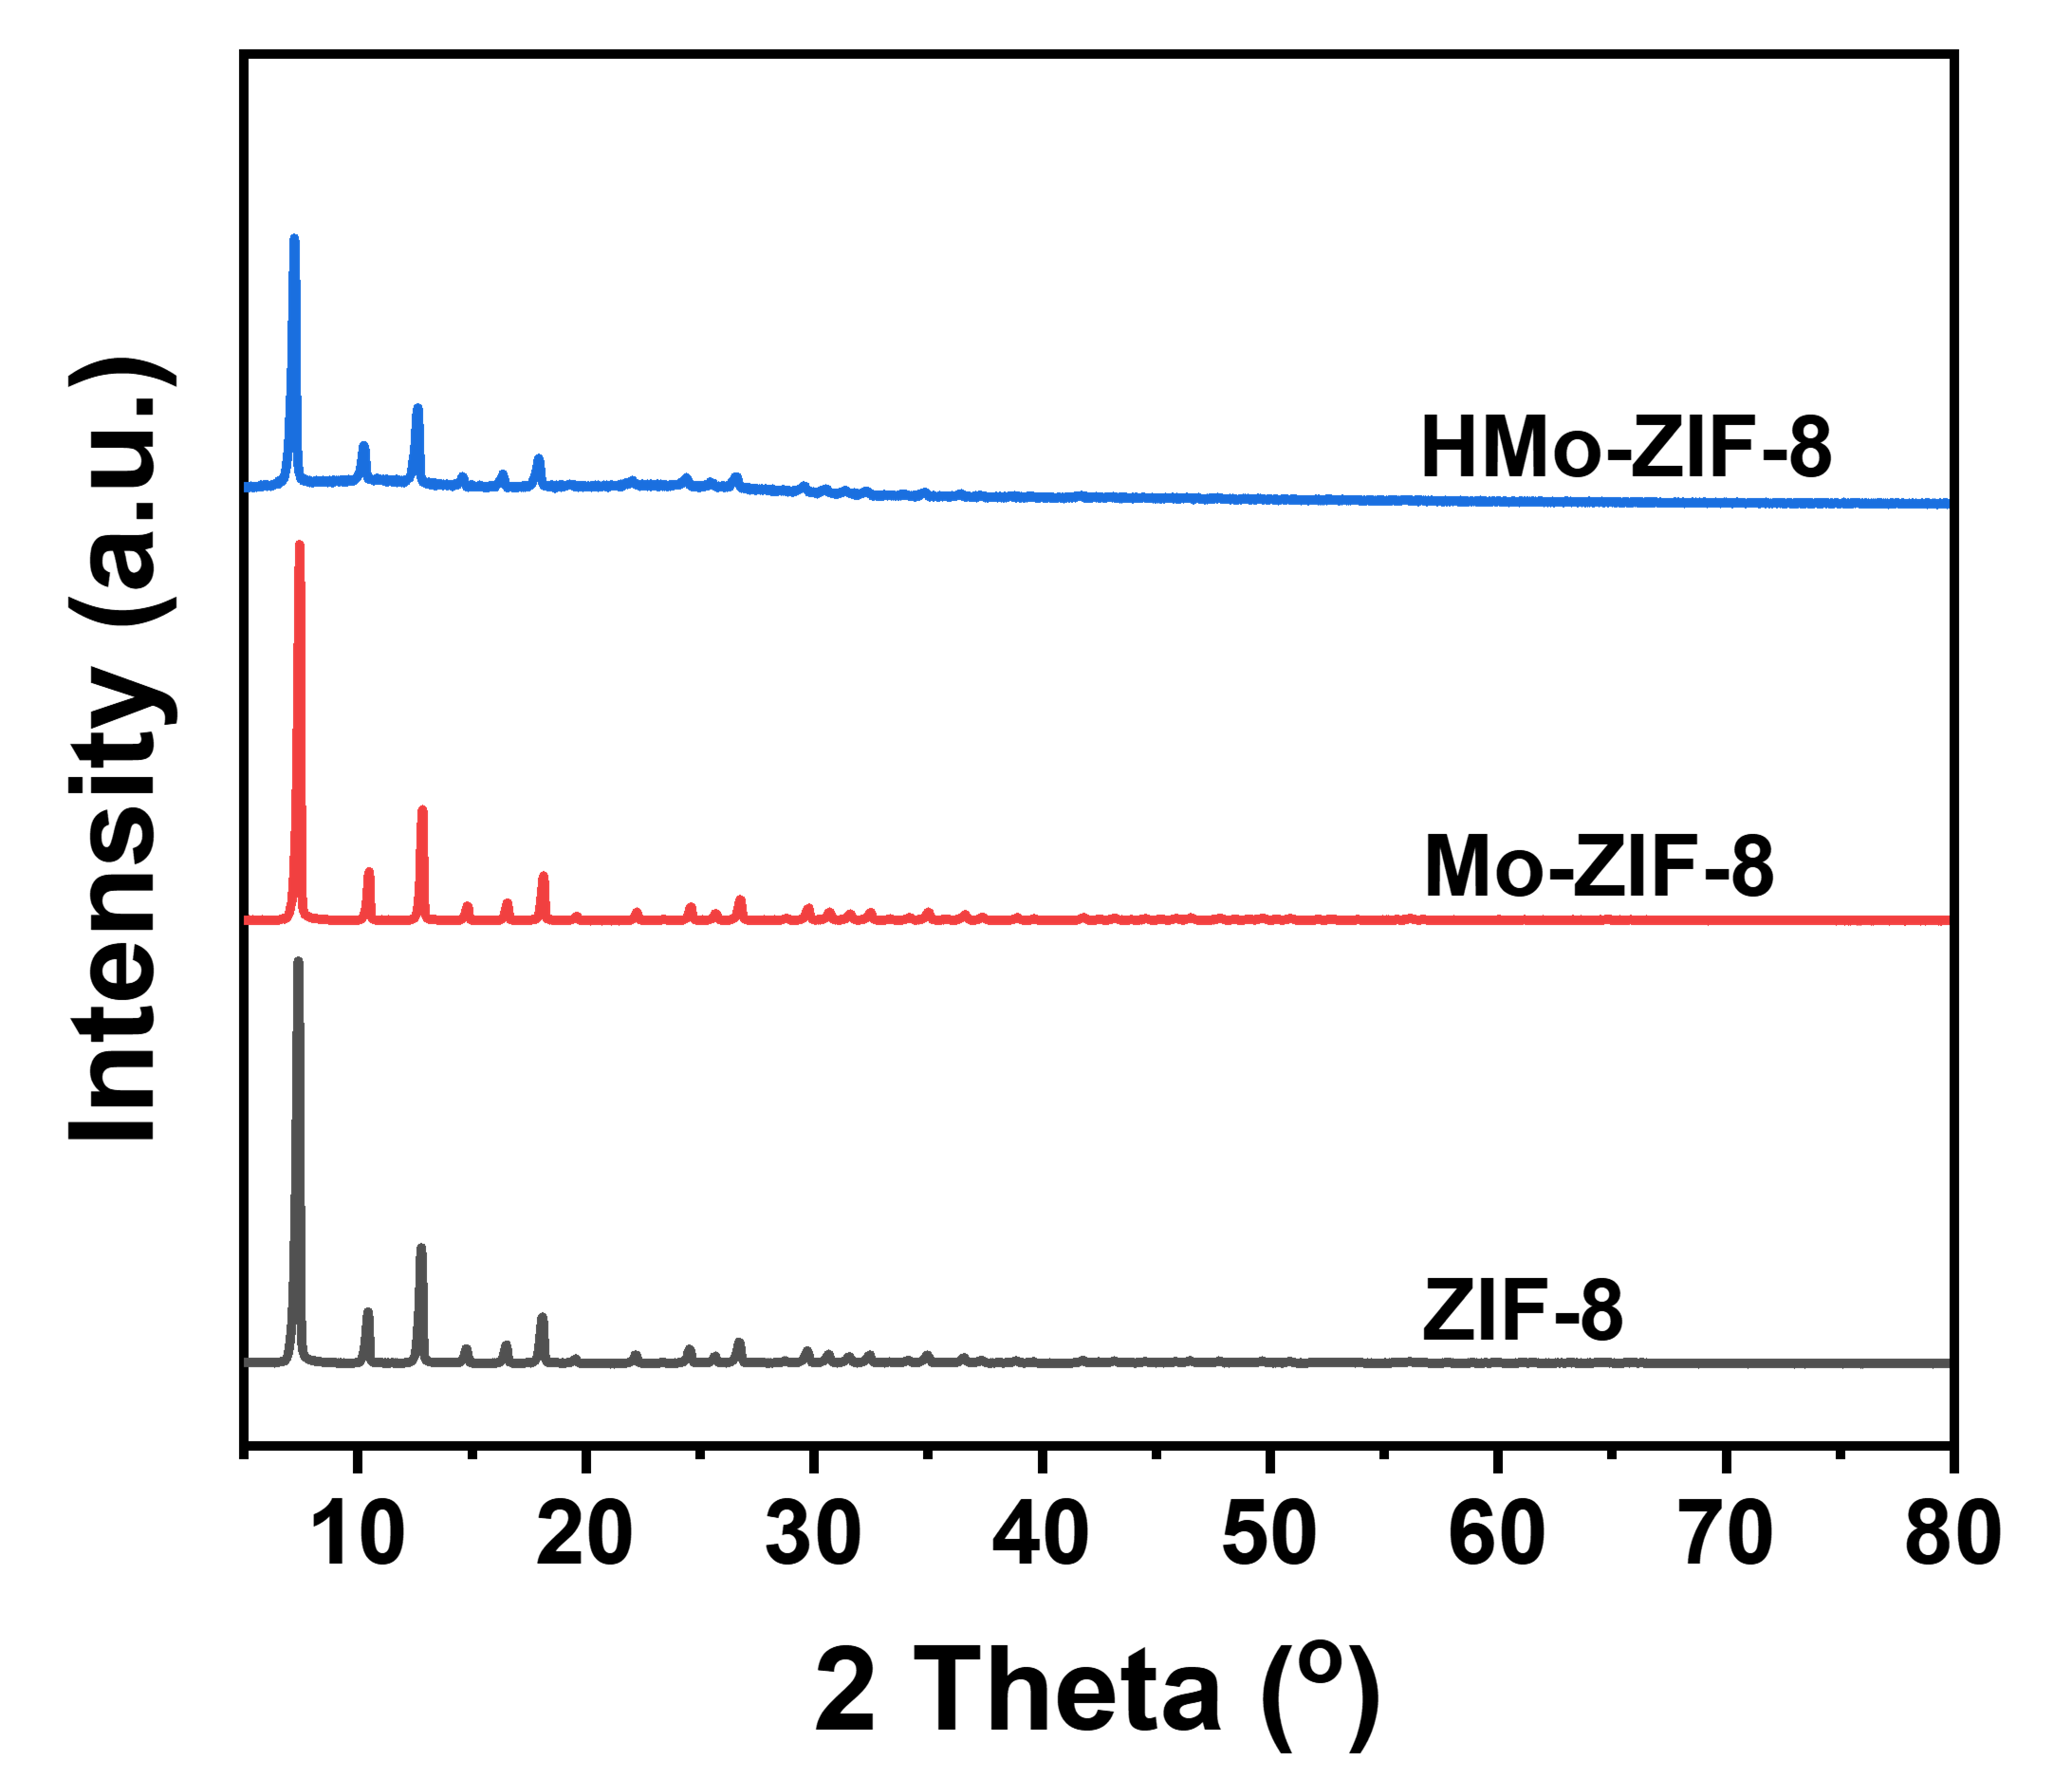
**

**Figure S2.** XRD patterns of ZIF-8, Mo-ZIF-8, HMo-ZIF-8.

**
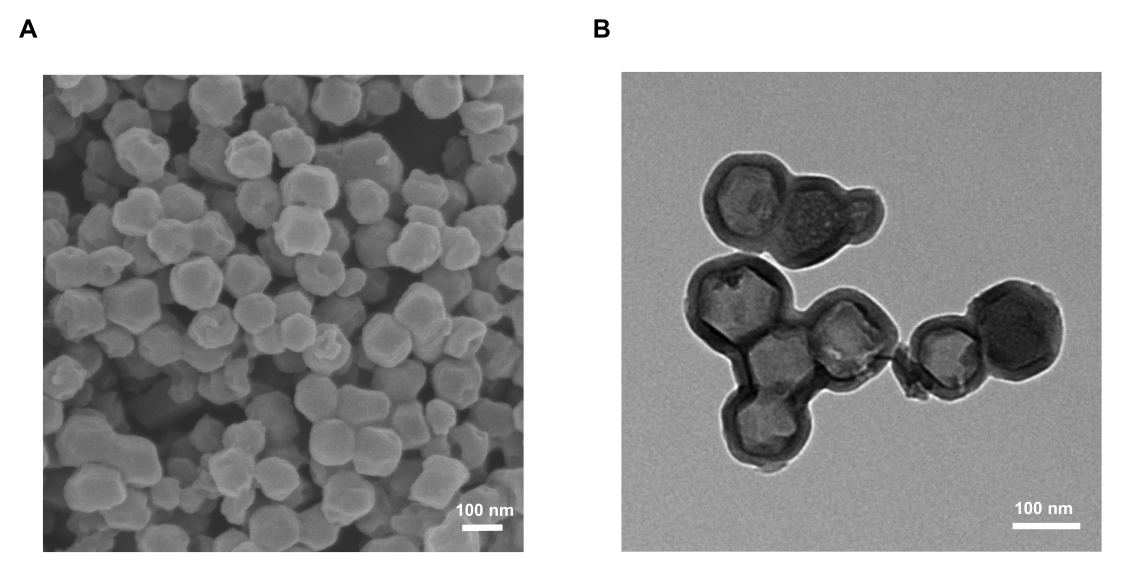
**

**Figure S3.** (A) SEM and (B) TEM images of HMo-ZIF-8.

**
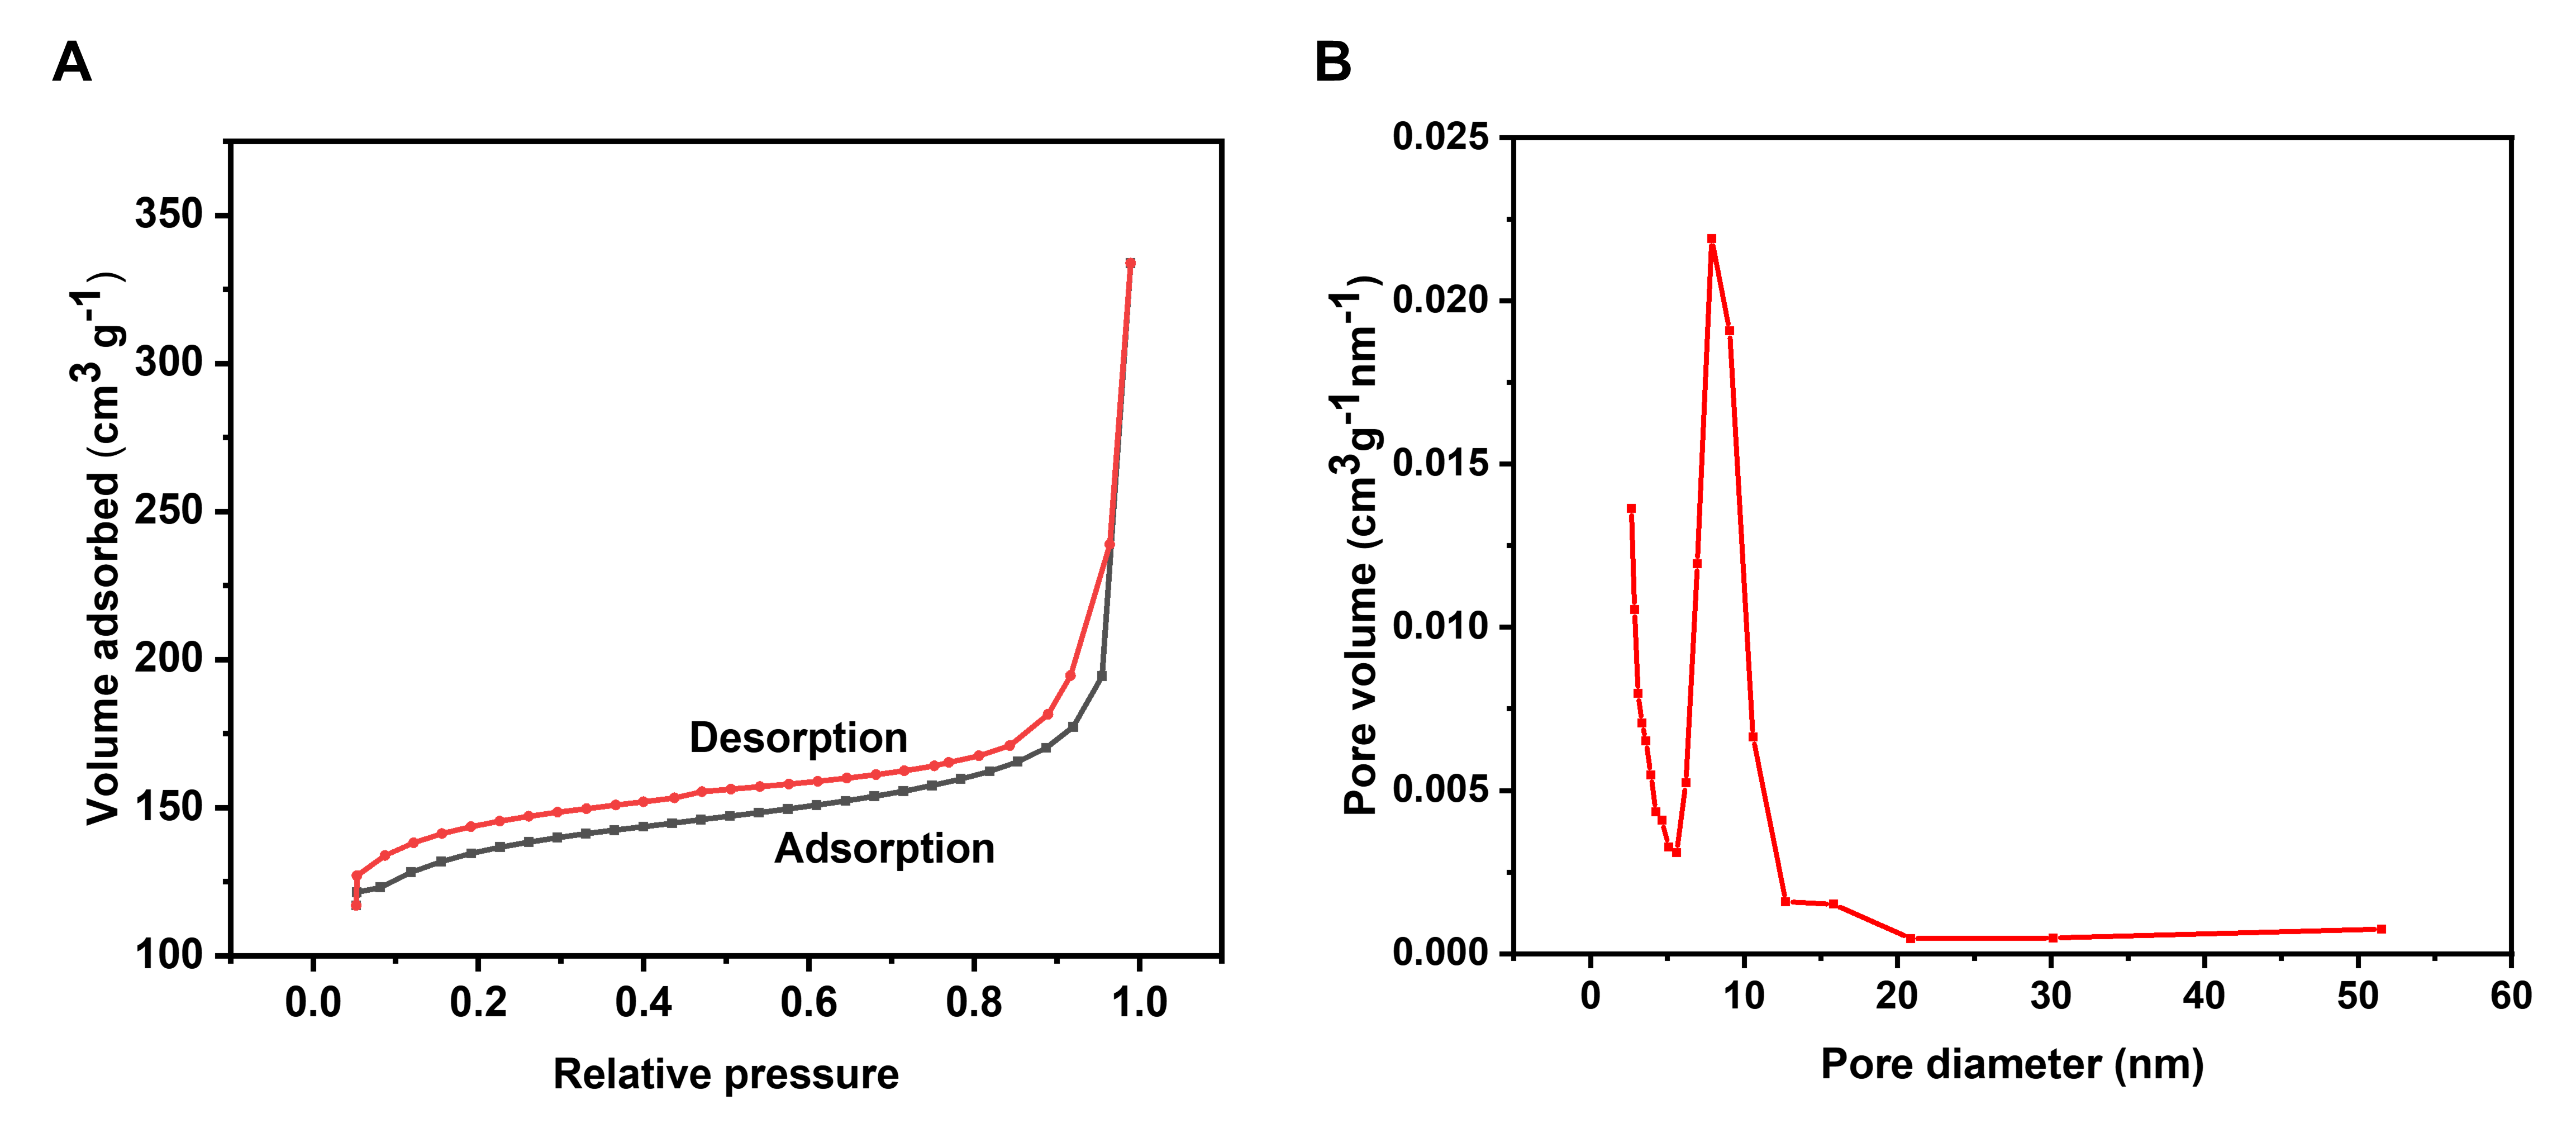
**

**Figure S4.** (A) Nitrogen adsorption-desorption isotherms and (B) pore size distributions of HMMo-SAzyme.

**
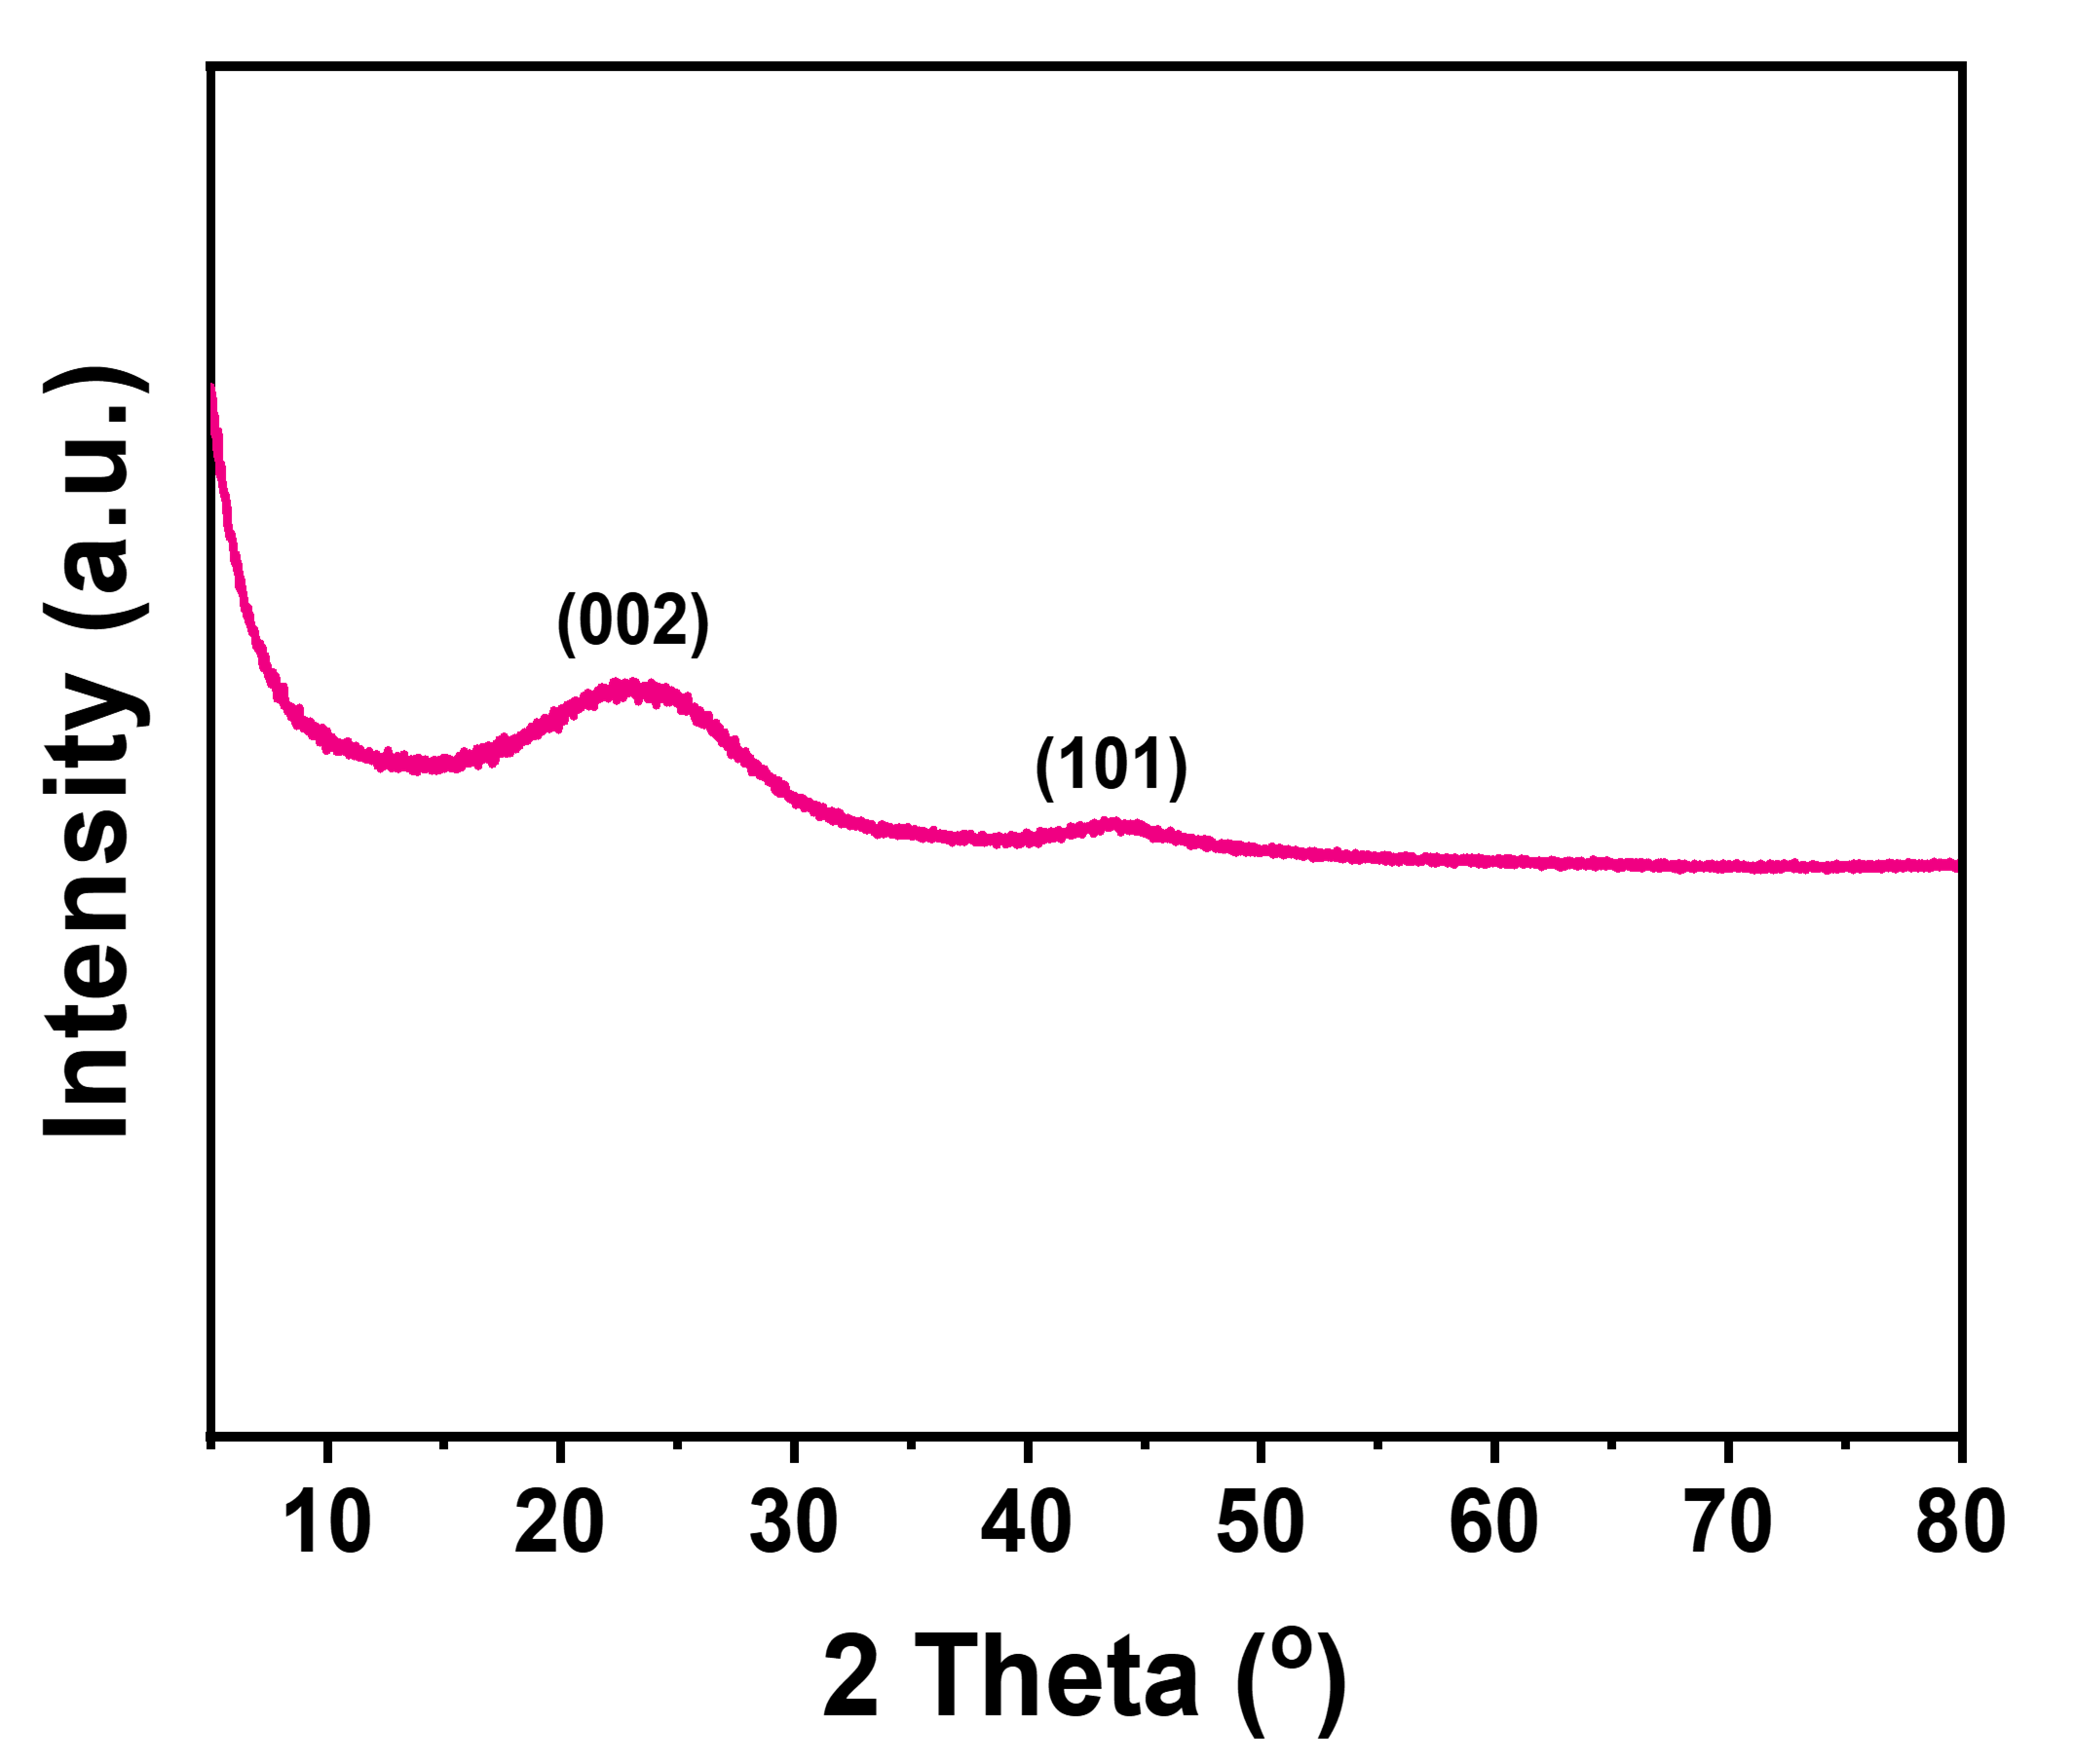
**

**Figure S5.** XRD patterns of HMMo-SAzyme.

**
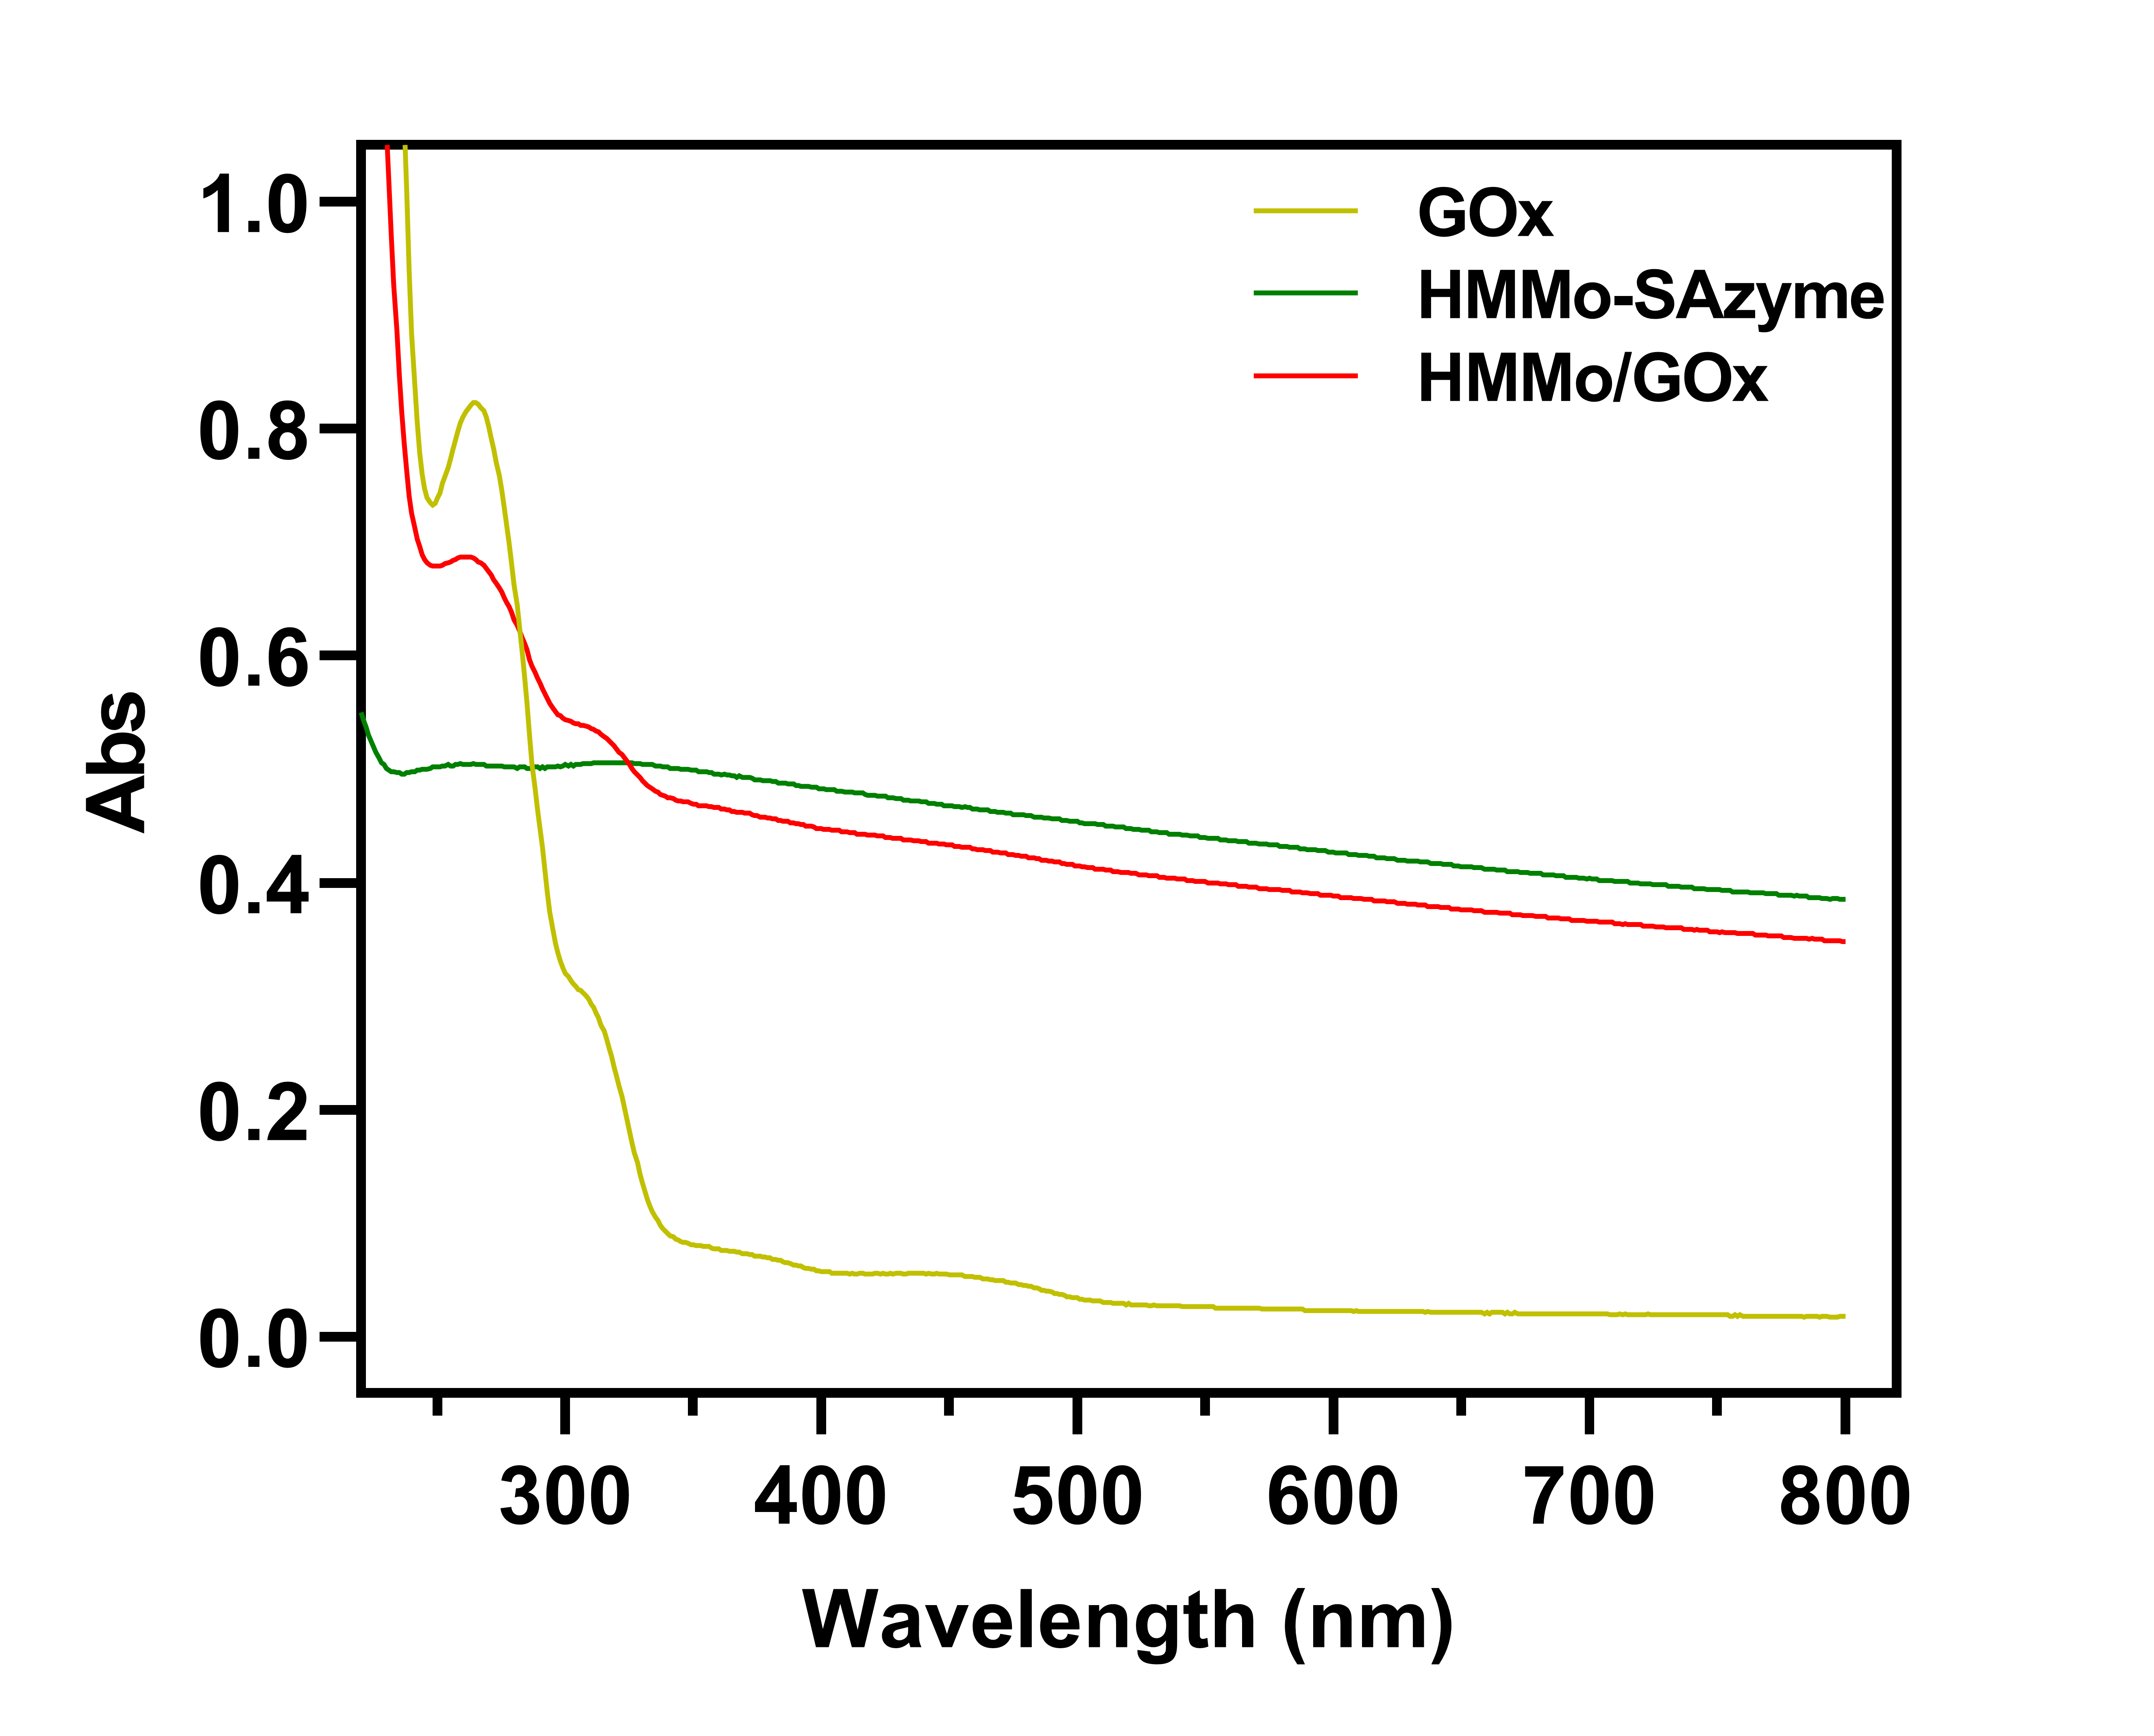
**

**Figure S6.** UV–vis absorption spectra of GOx, HMMo-SAzyme and HMMo/GOx.

**
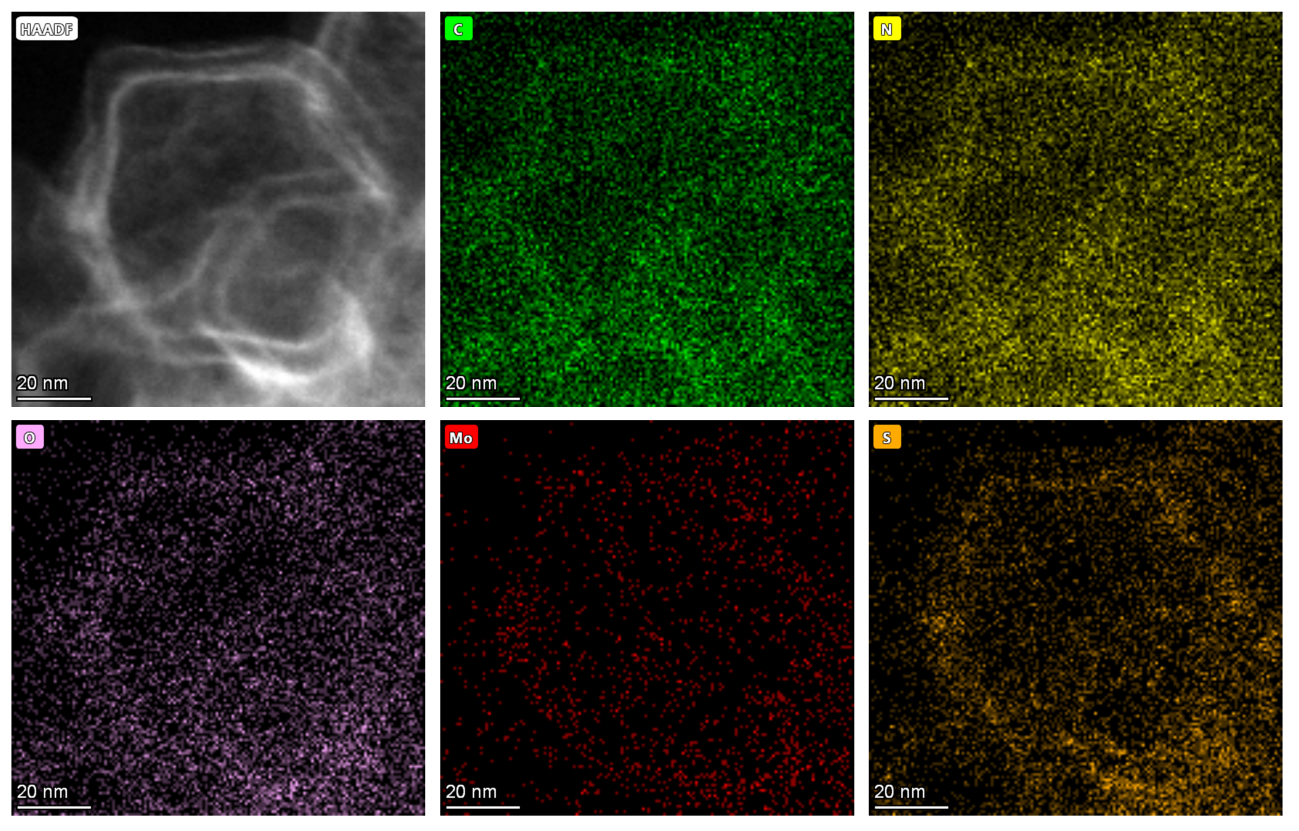
**

**Figure S7.** EDS mapping images of HMMo/GOx@HA.

**
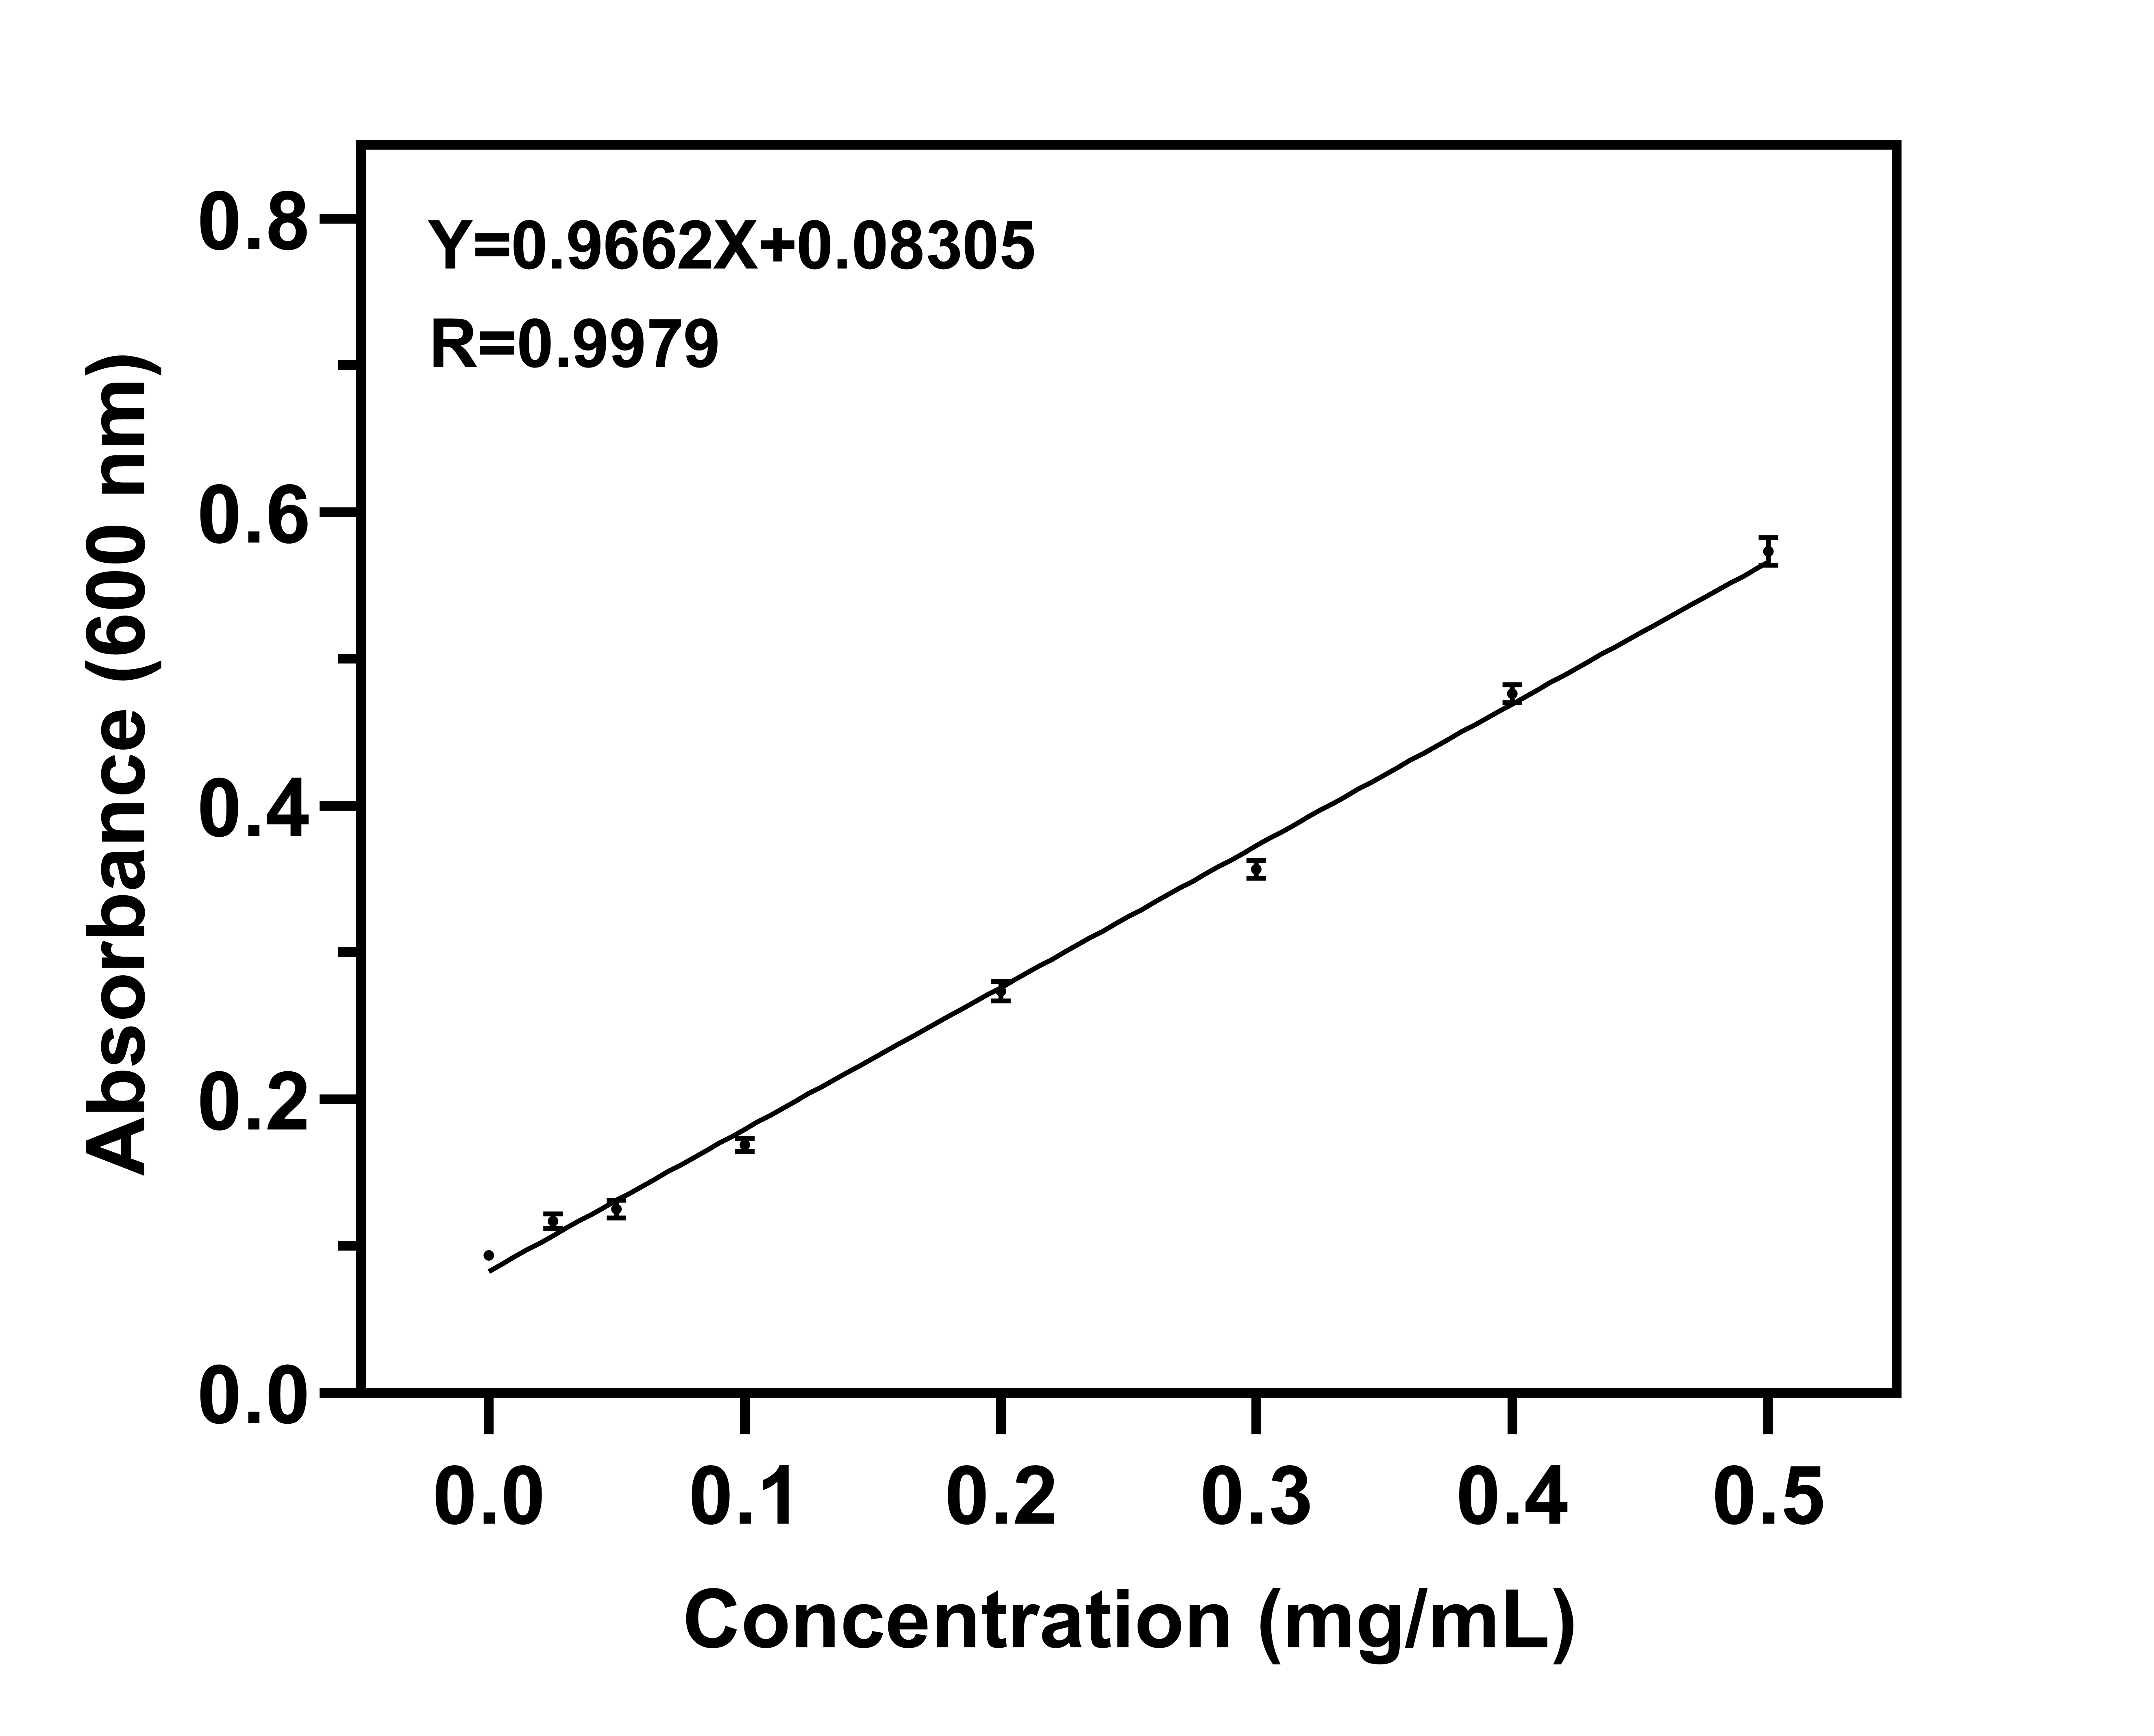
**

**Figure S8.** The standard curve of GOx for BCA Protein Assay Kit. Data are shown as mean ± SD.

**
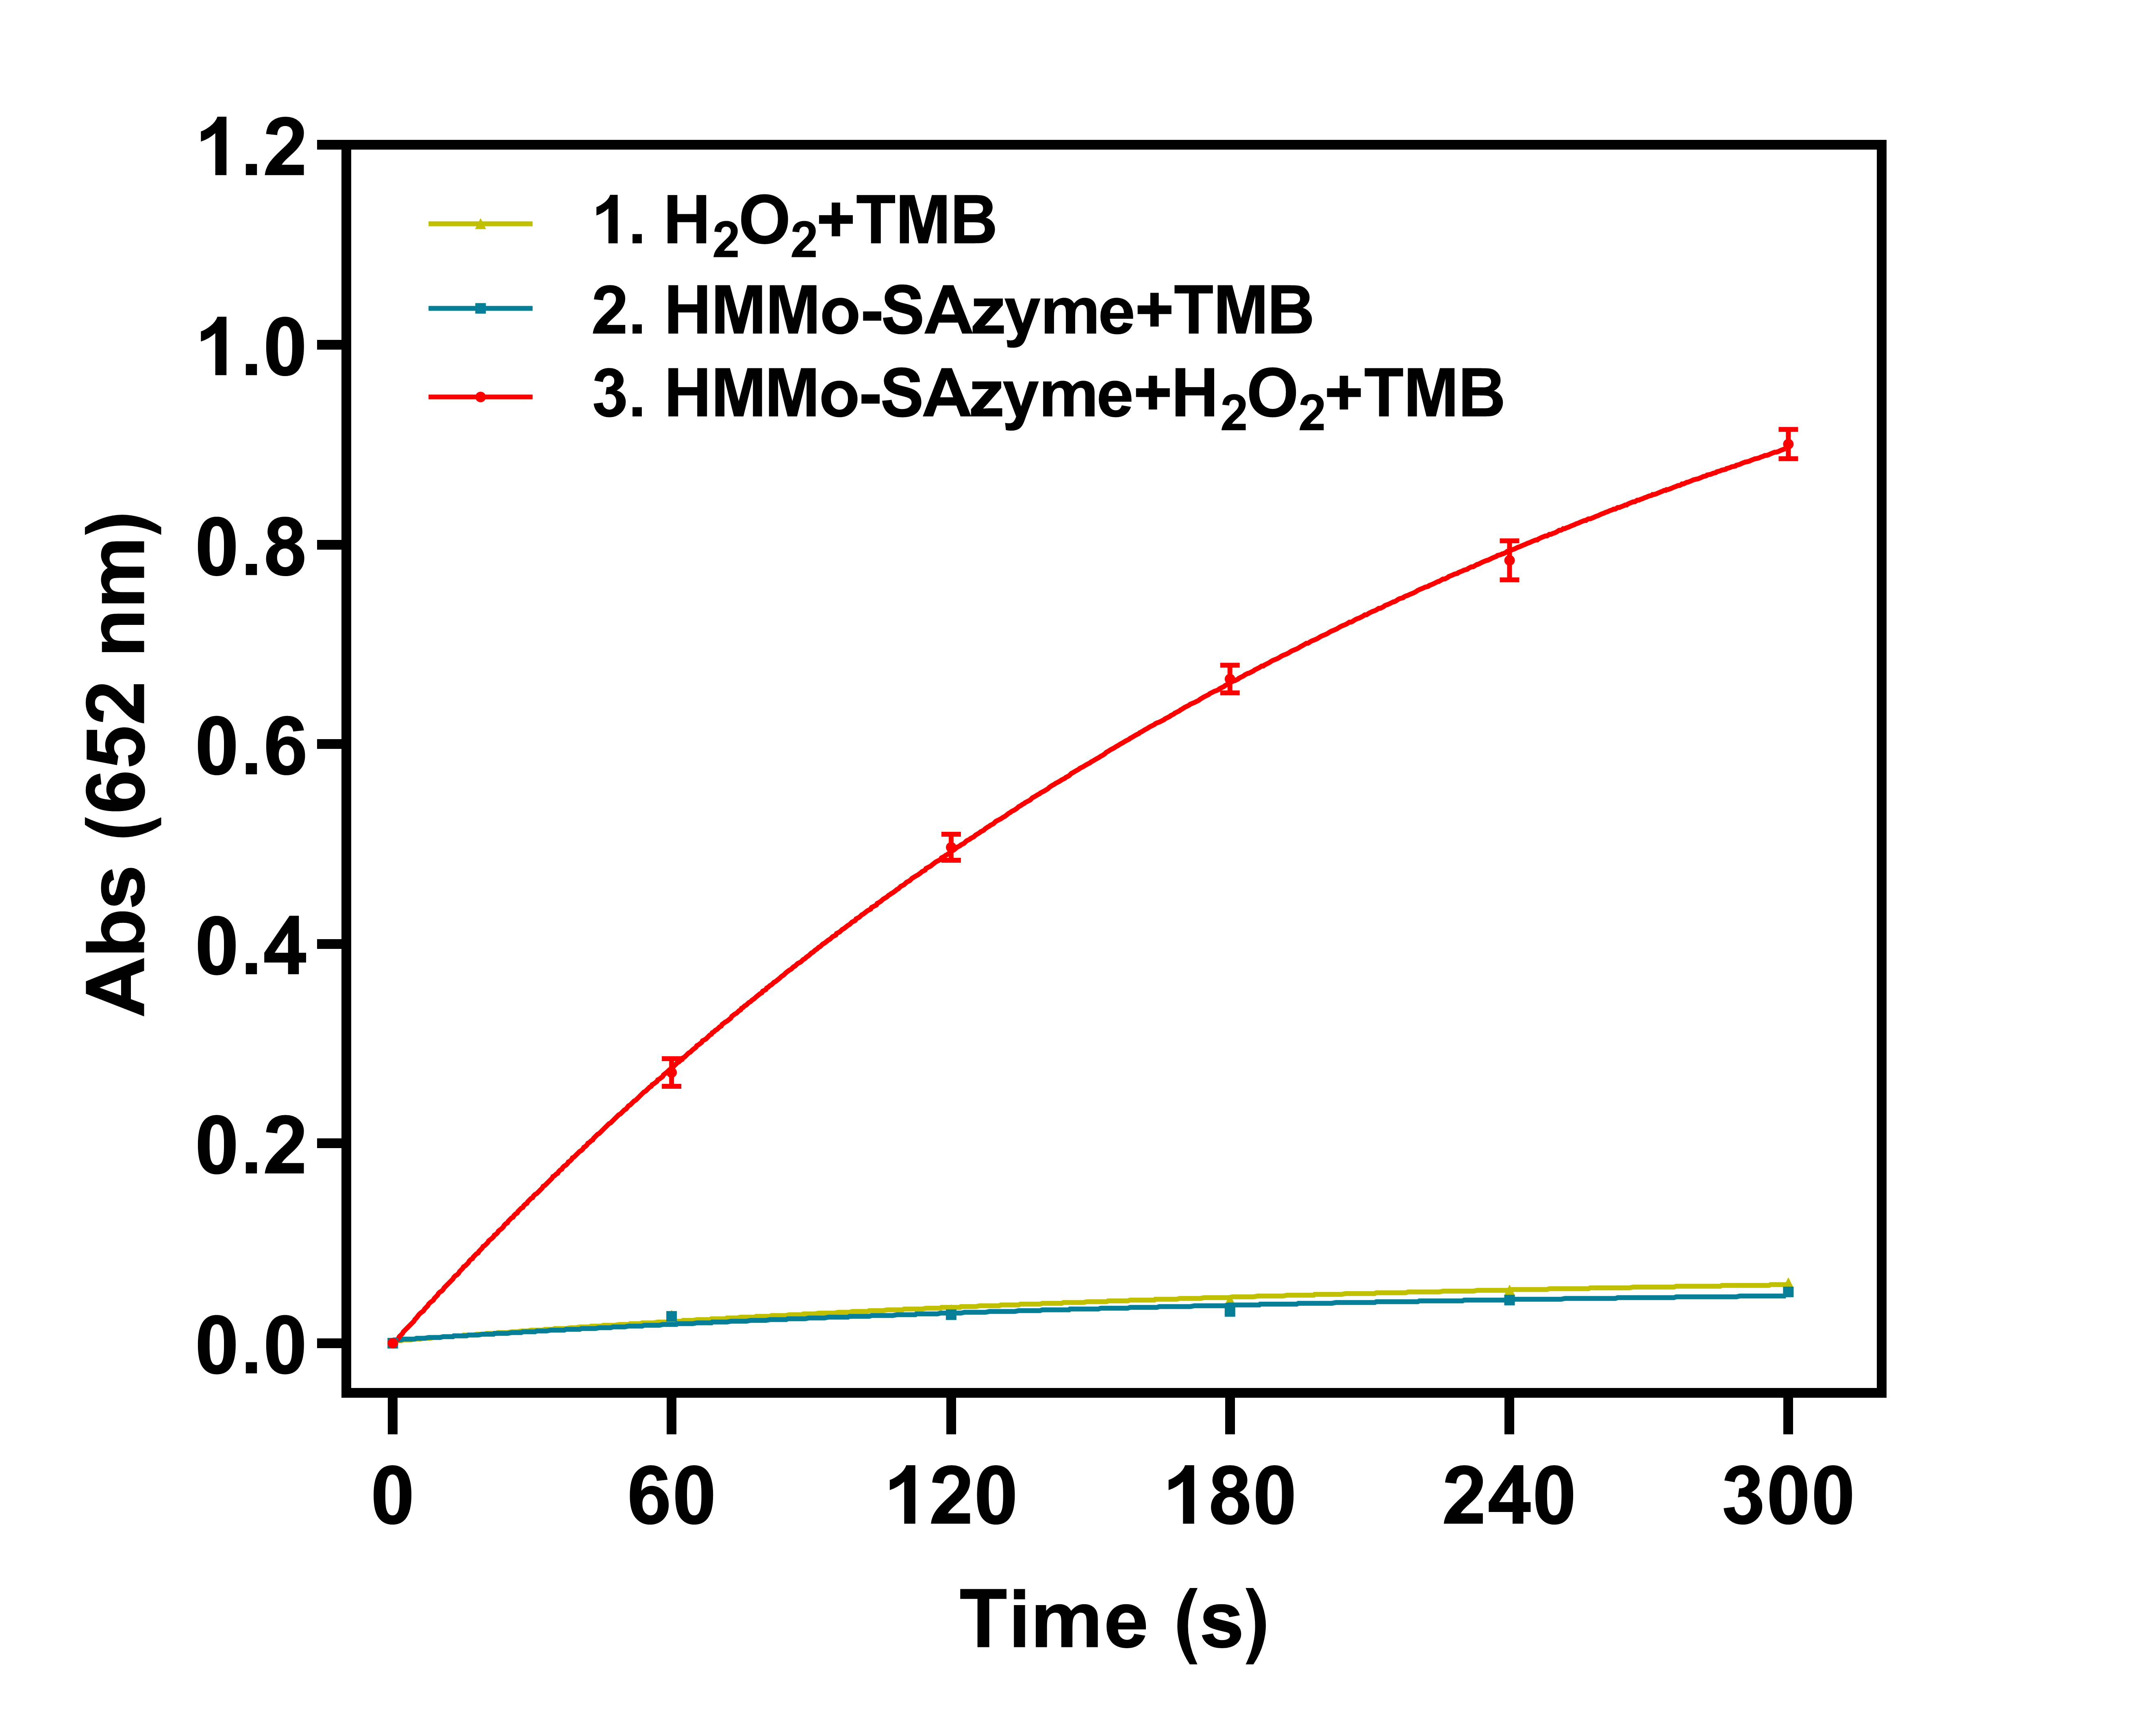
**

**Figure S9.** UV−vis absorbance versus reaction time at 652 nm. Data are shown as mean ± SD.

**
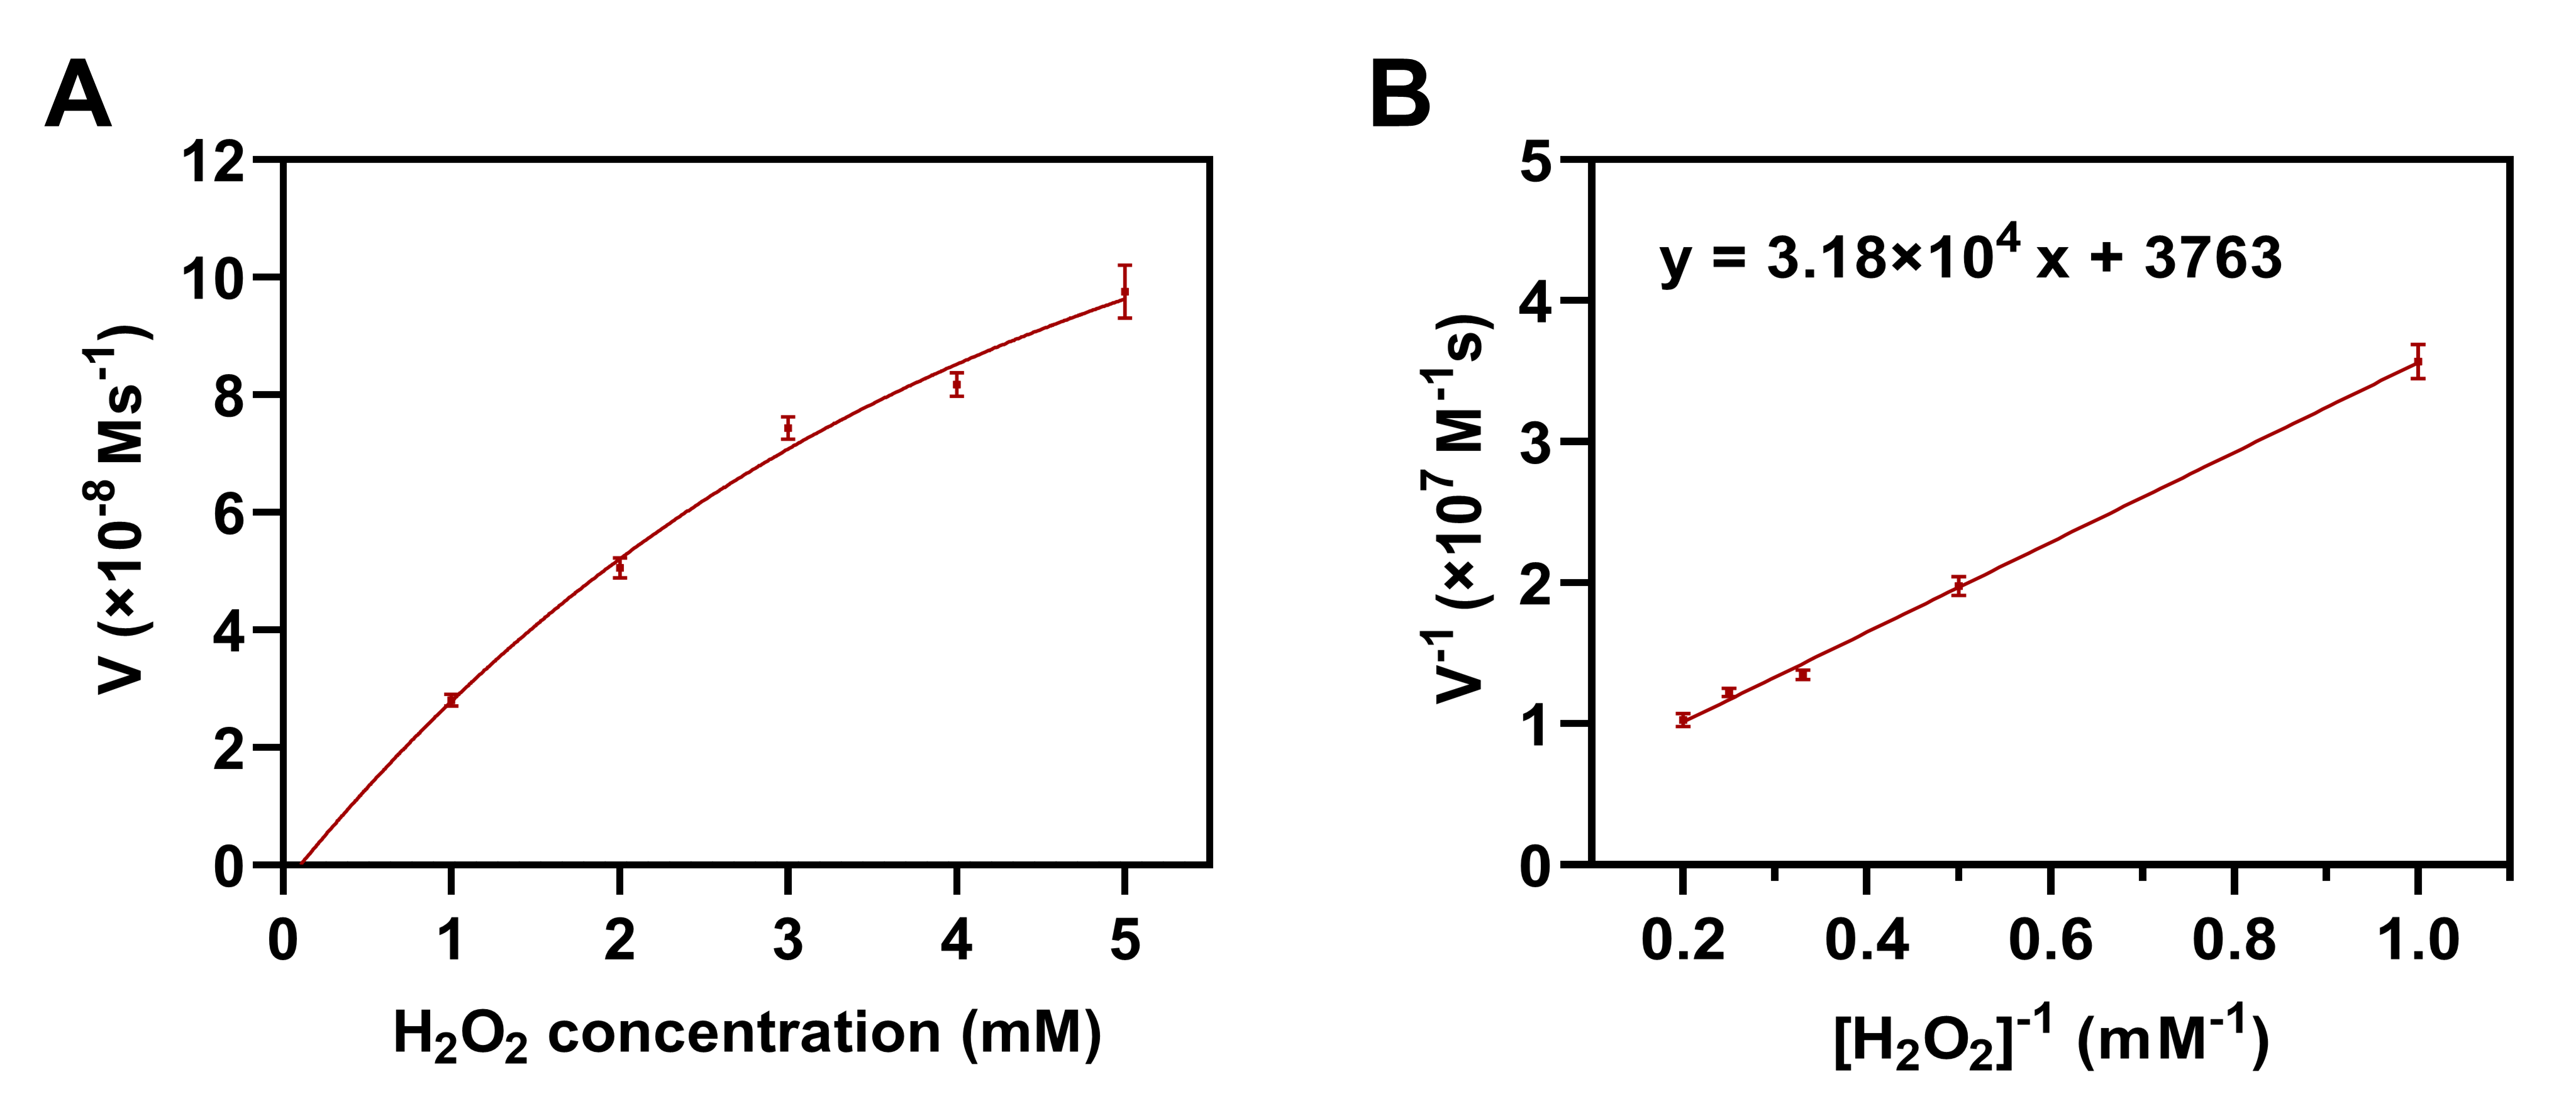
**

**Figure S10.** (A) The steady-state kinetic assays of HMMo-SAzyme for H2O2. (B) Linear double-reciprocal plotting for HMMo-SAzyme with H2O2 as substrate. Data are shown as mean ± SD.

**
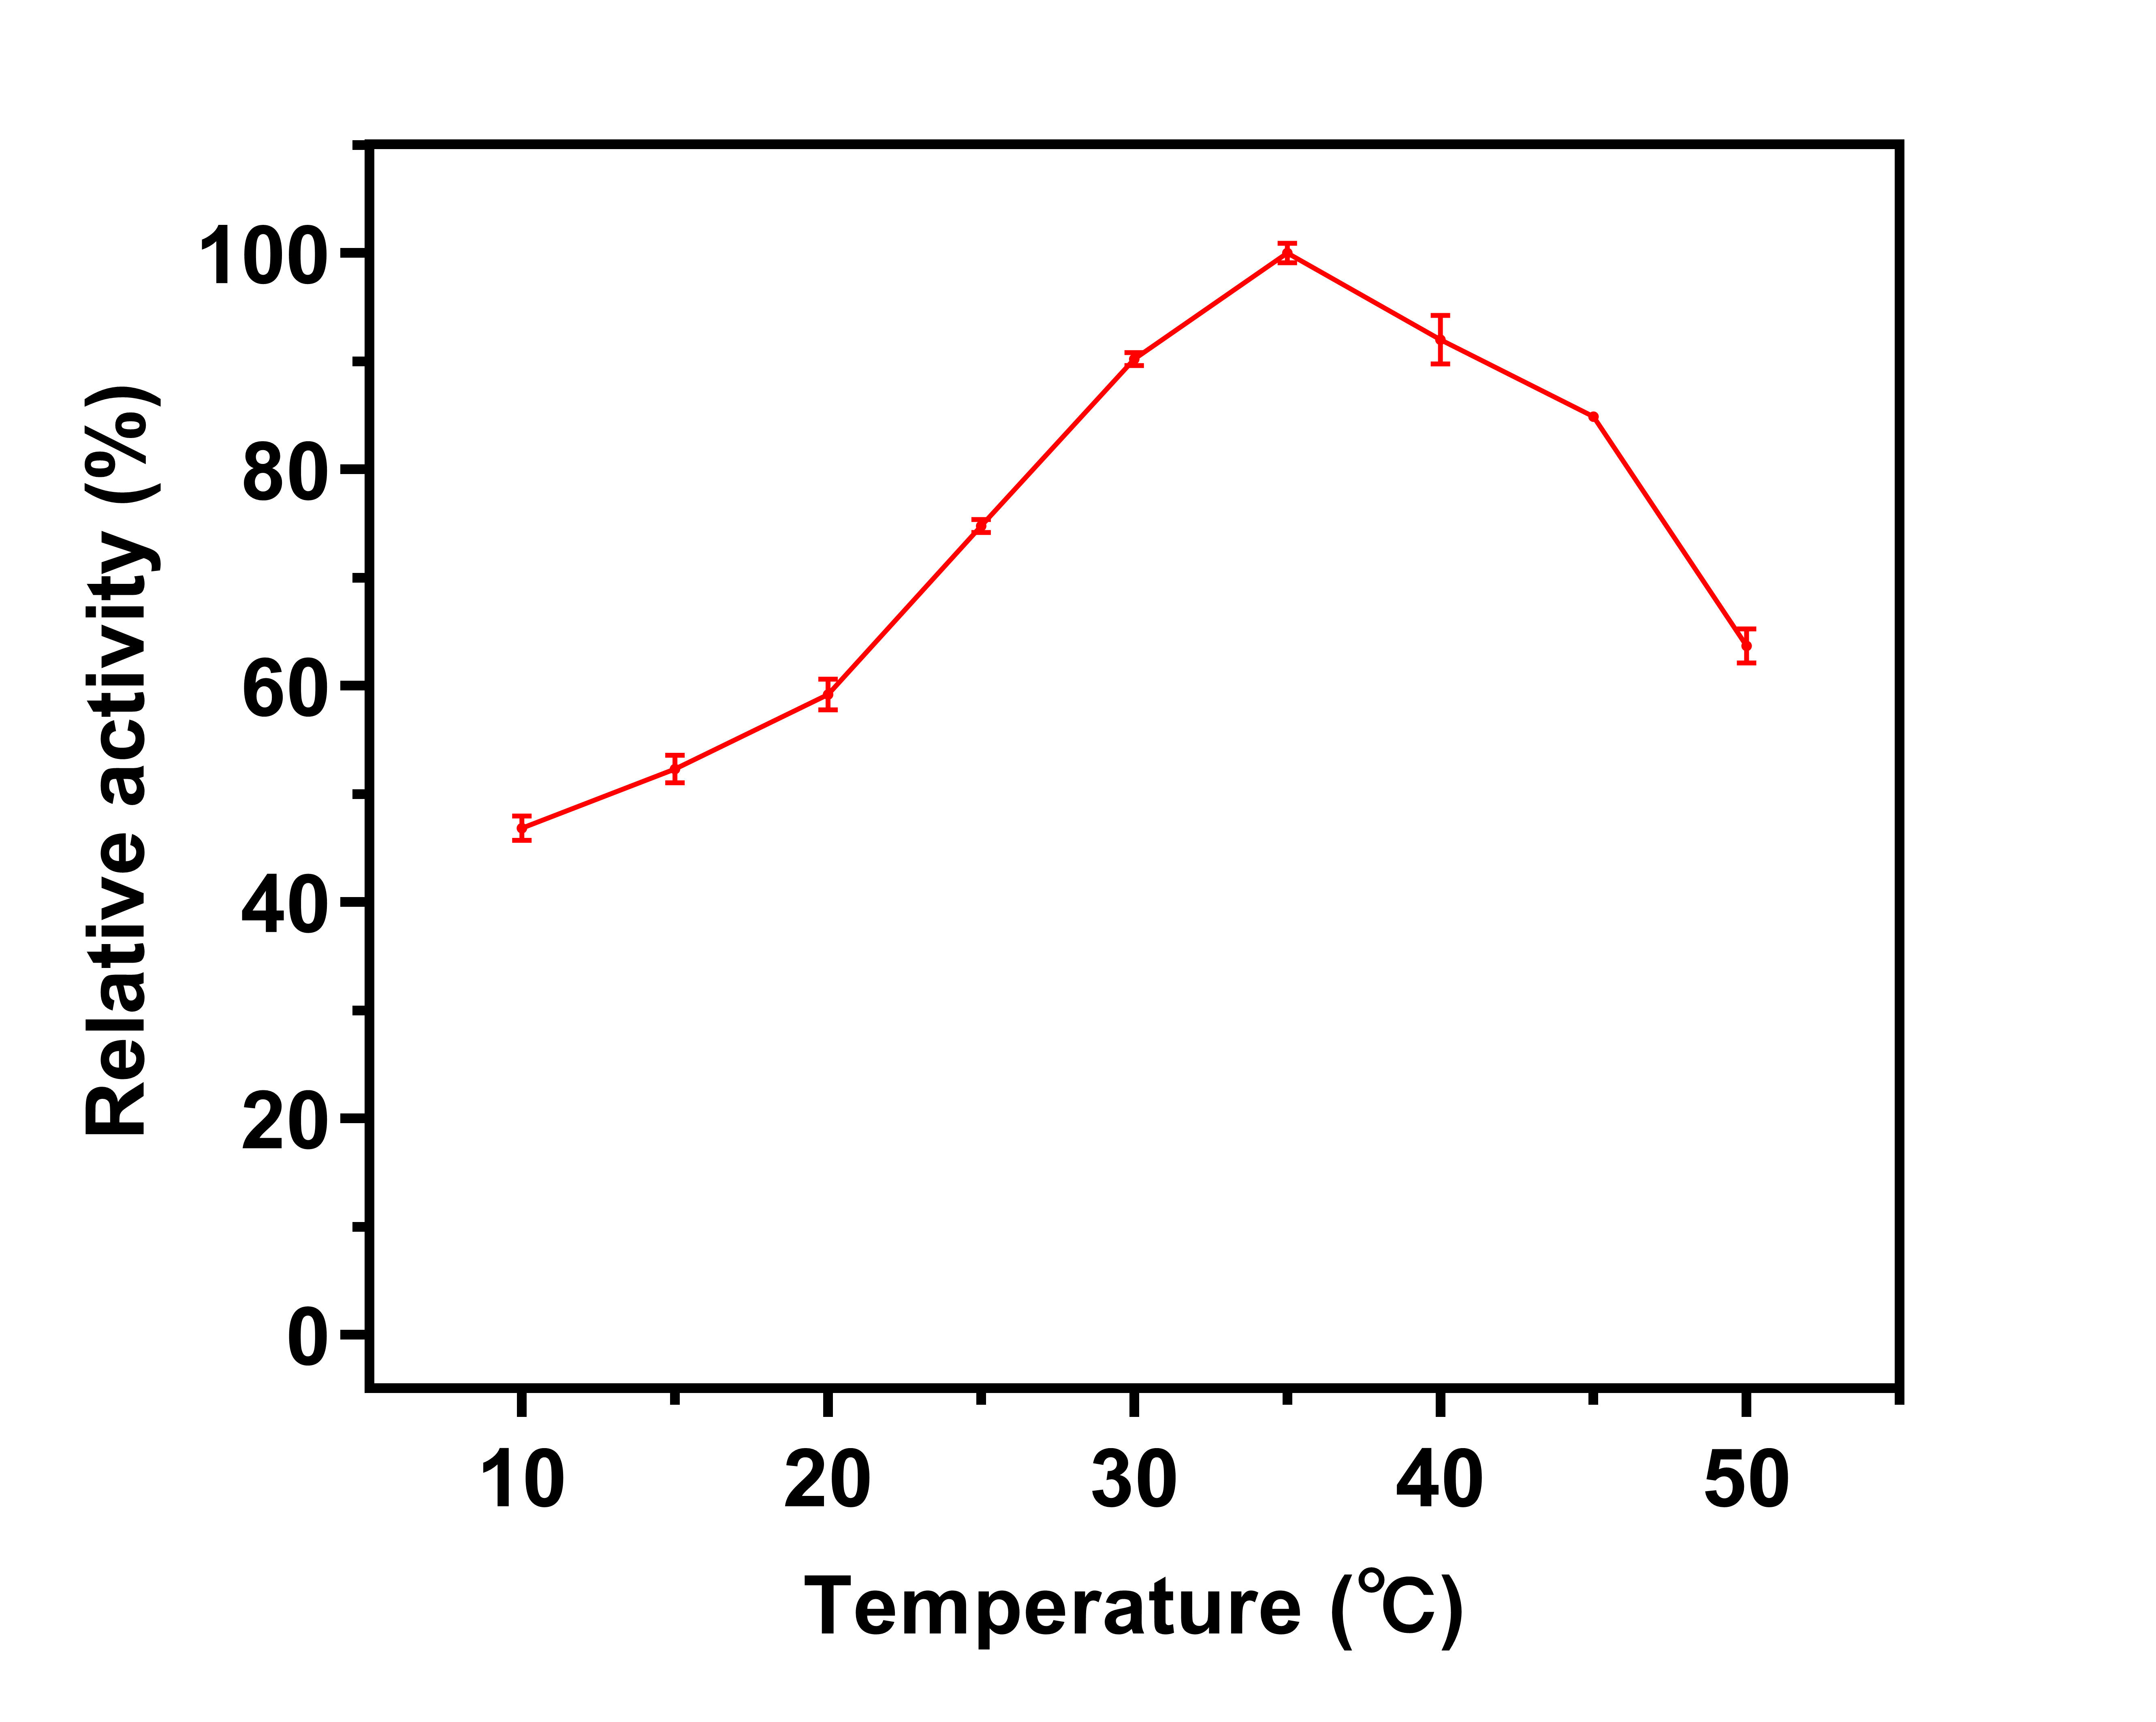
**

**Figure S11.** Peroxidase-like activity of HMMo-SAzyme at different temperatures. Data are shown as mean ± SD.

**
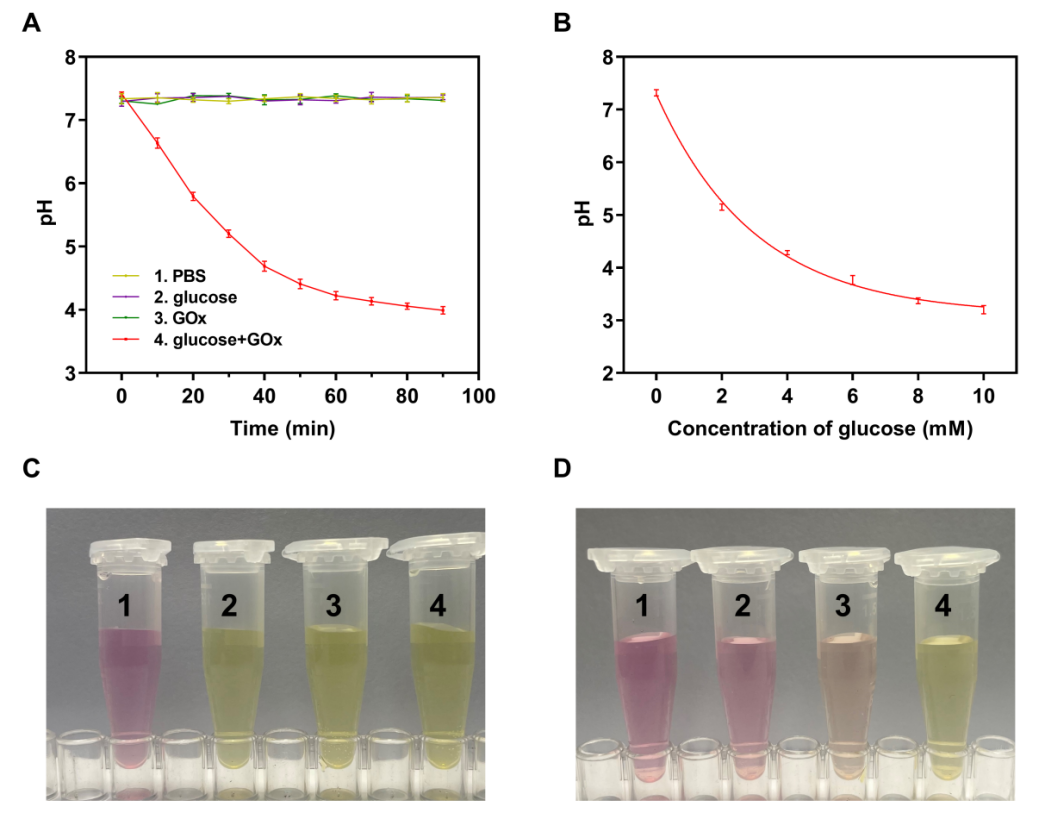
**

**Figure S12.** (A) The variation of pH value under different conditions: (1) PBS, (2) only glucose in PBS, (3) only GOx in PBS, (4) glucose and GOx in PBS. (B) Variation of pH value arising from the reaction between GOx and different concentrations of glucose. Data are shown as mean ± SD. (C) The corresponding photographs of different reaction systems in (A) upon the addition of methyl red. (D) Standard photographs of phosphate buffers at different pH values upon the addition of methyl red: (1) pH 3.0, (2) pH 4.0, (3) pH 5.0, (4) pH 6.0.


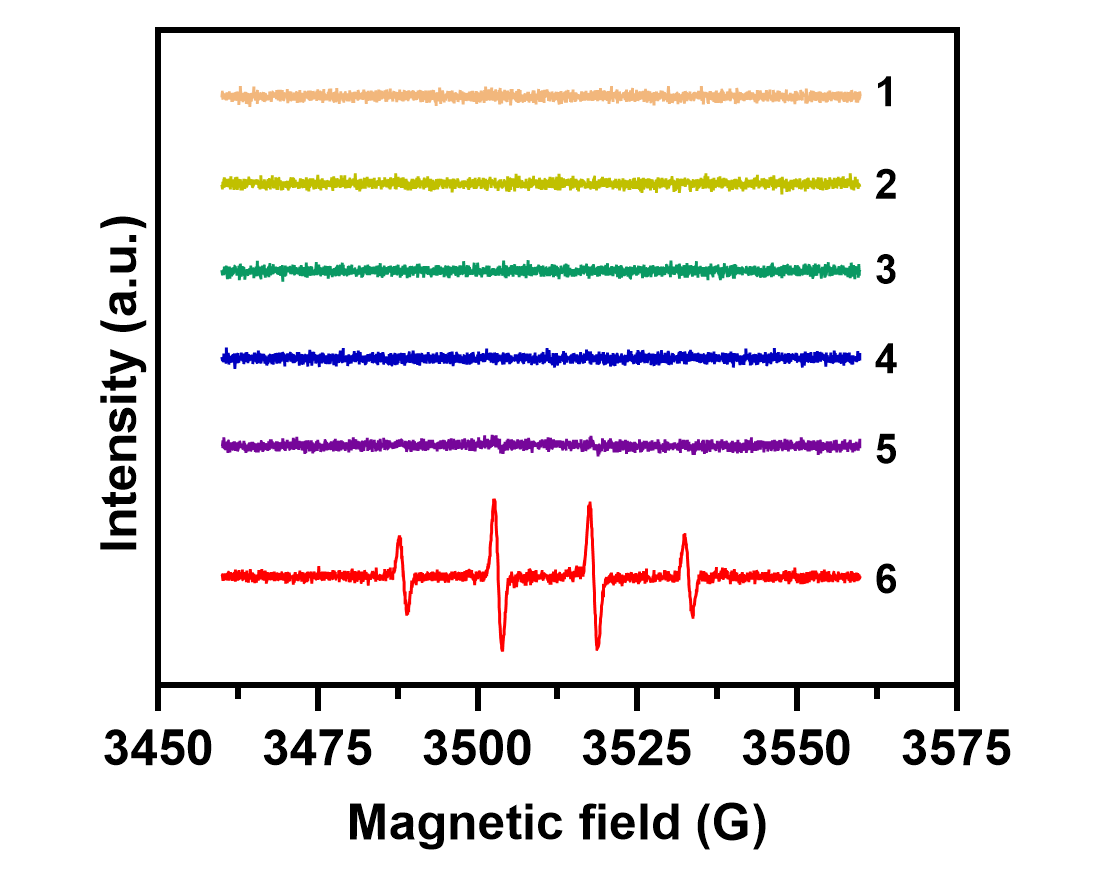


**Figure S13.** ESR spectra demonstrating •OH generation. (1) PBS, (2) glucose, (3) HMMo/GOx, (4) glucose + HMMo-SAzyme, (5) glucose + GOx, (6) glucose + HMMo/GOx.

**
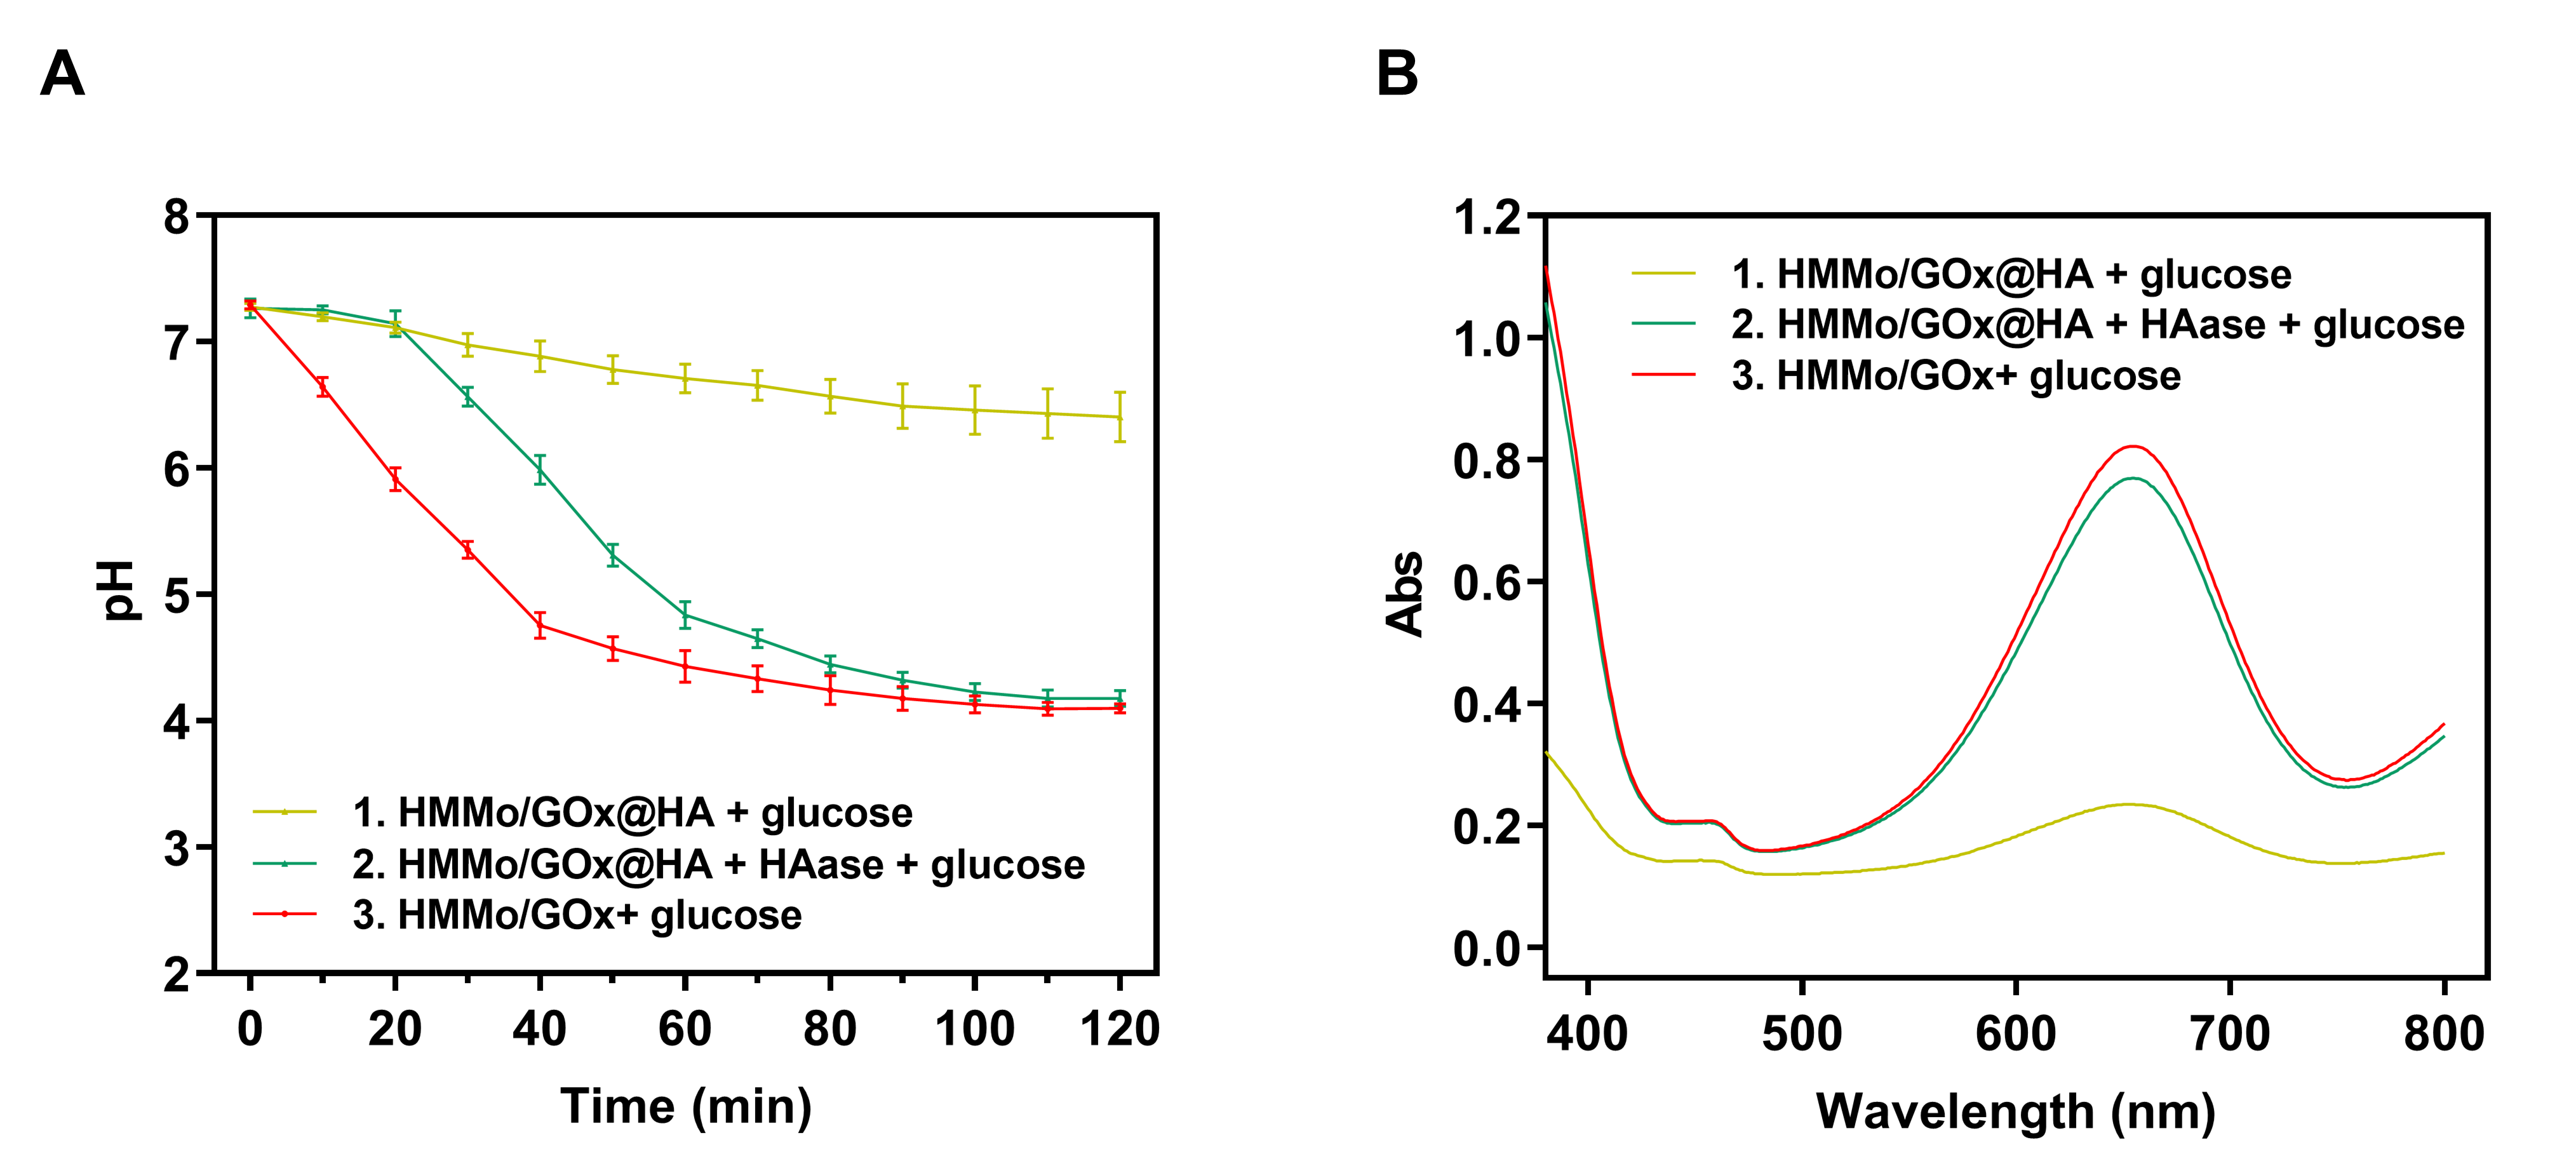
**

**Figure S14.** (A) The pH value versus reaction time under different reaction systems. Data are shown as mean ± SD. (B) UV−vis spectra of different reaction systems in the presence of TMB.

**
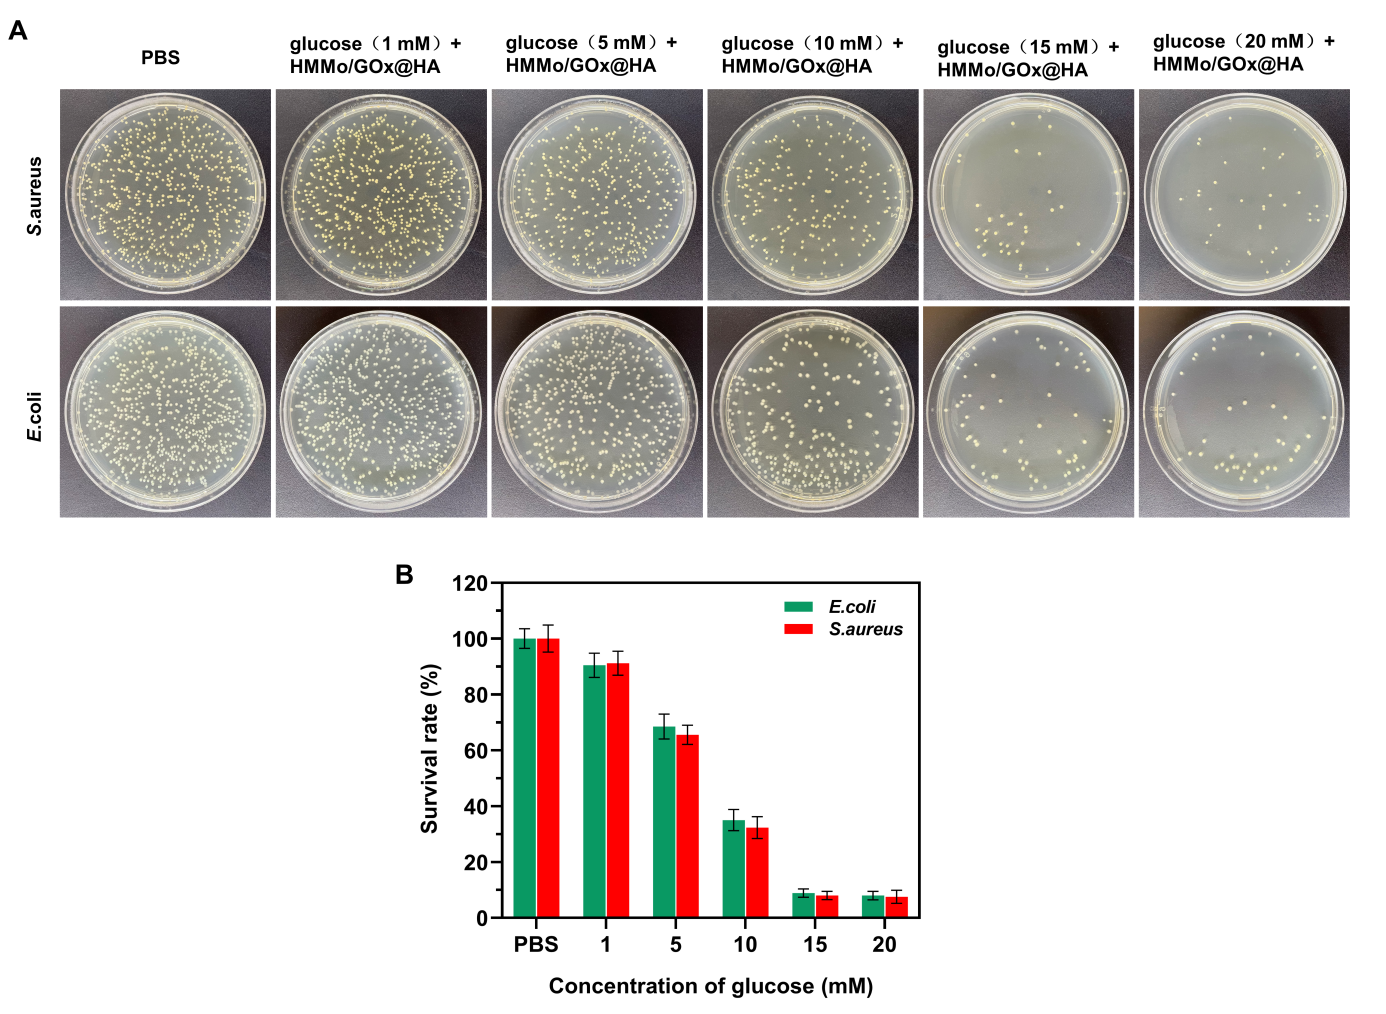
**

**Figure S15.** (A) Photographs of bacterial colonies and (B) corresponding survival rates of *S. aureus* and *E. coli* after being treated with different concentrations of glucose, respectively. Data are shown as mean ± SD.

**
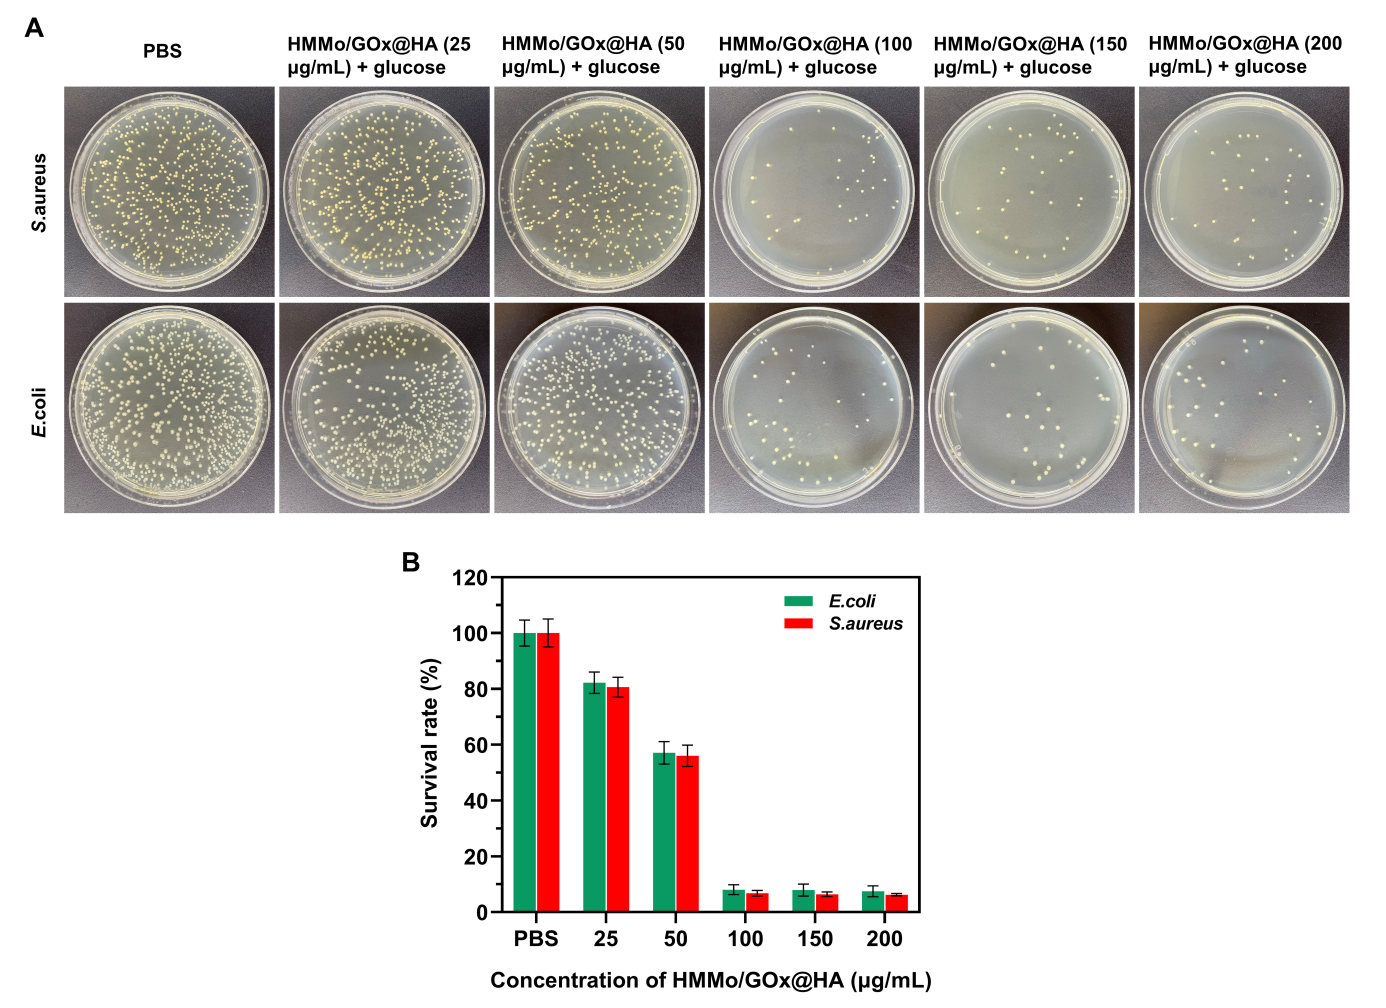
**

**Figure S16.** (A) Photographs of bacterial colonies and (B) corresponding survival rates of *S. aureus* and *E. coli* after being treated with different concentrations of HMMo/GOx@HA, respectively. Data are shown as mean ± SD.


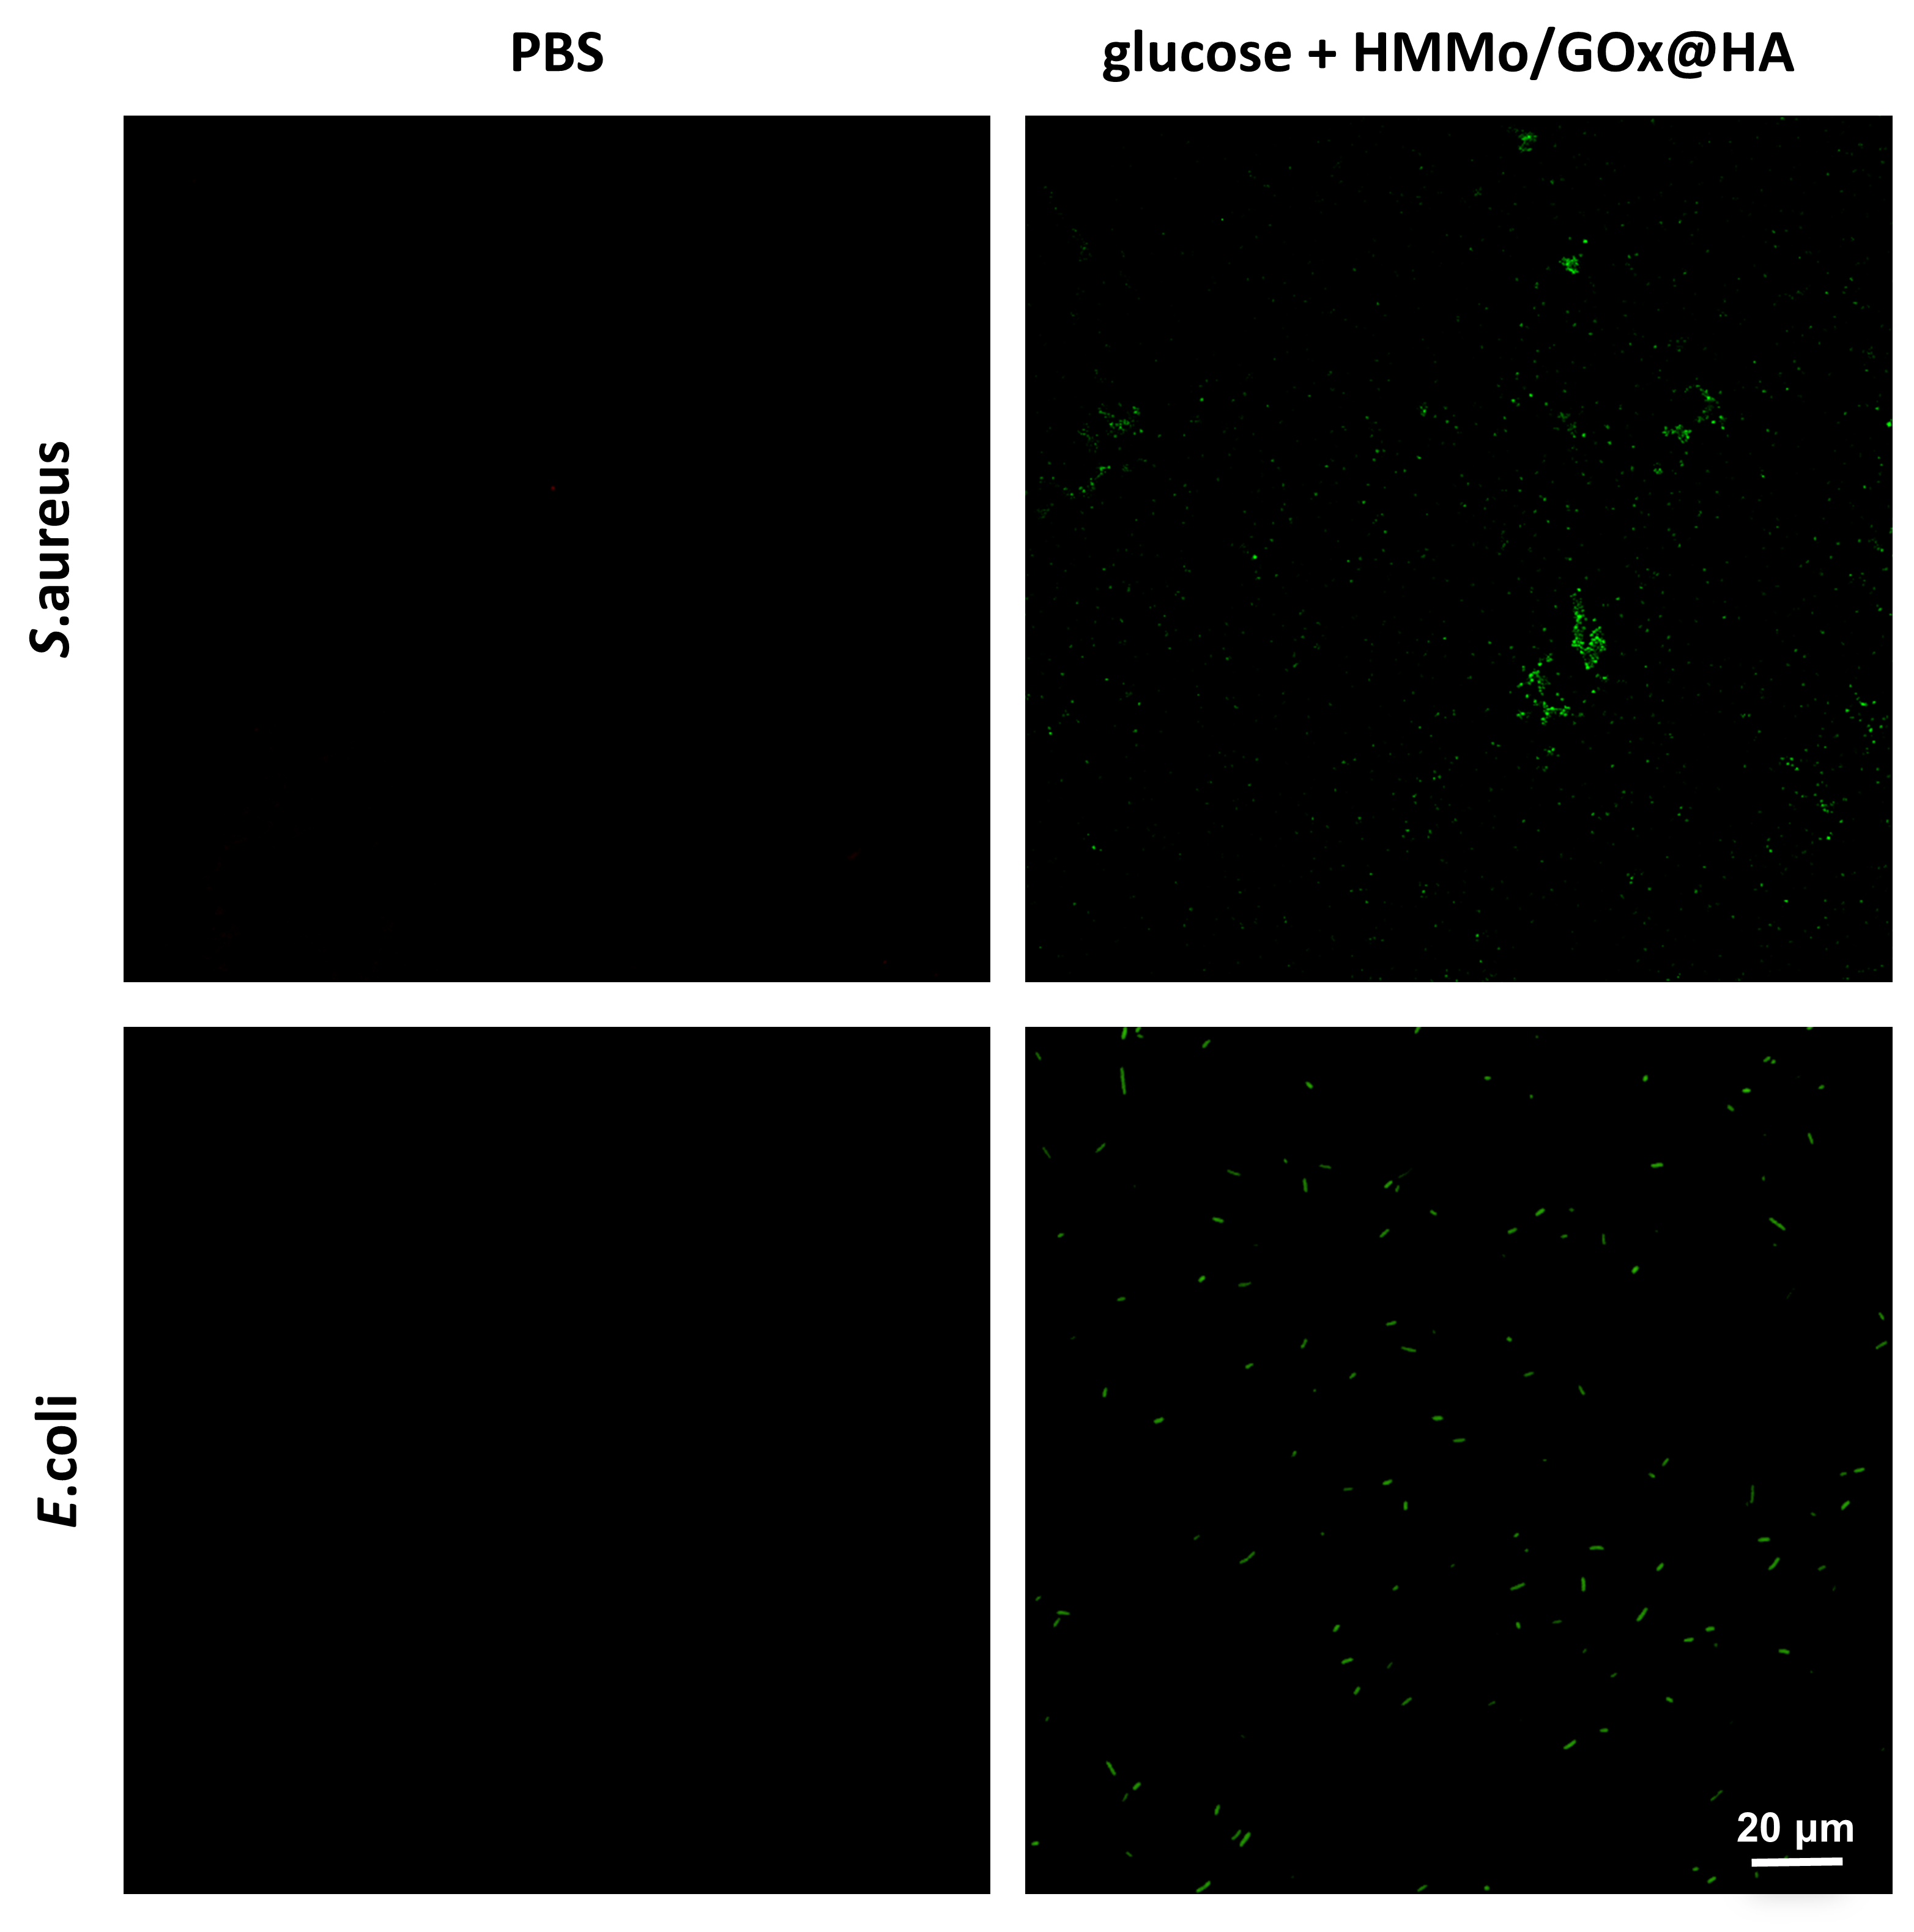


**Figure S17.** Detection of ROS in bacteria cells after treating with PBS or glucose + HMMo/GOx@HA.

**
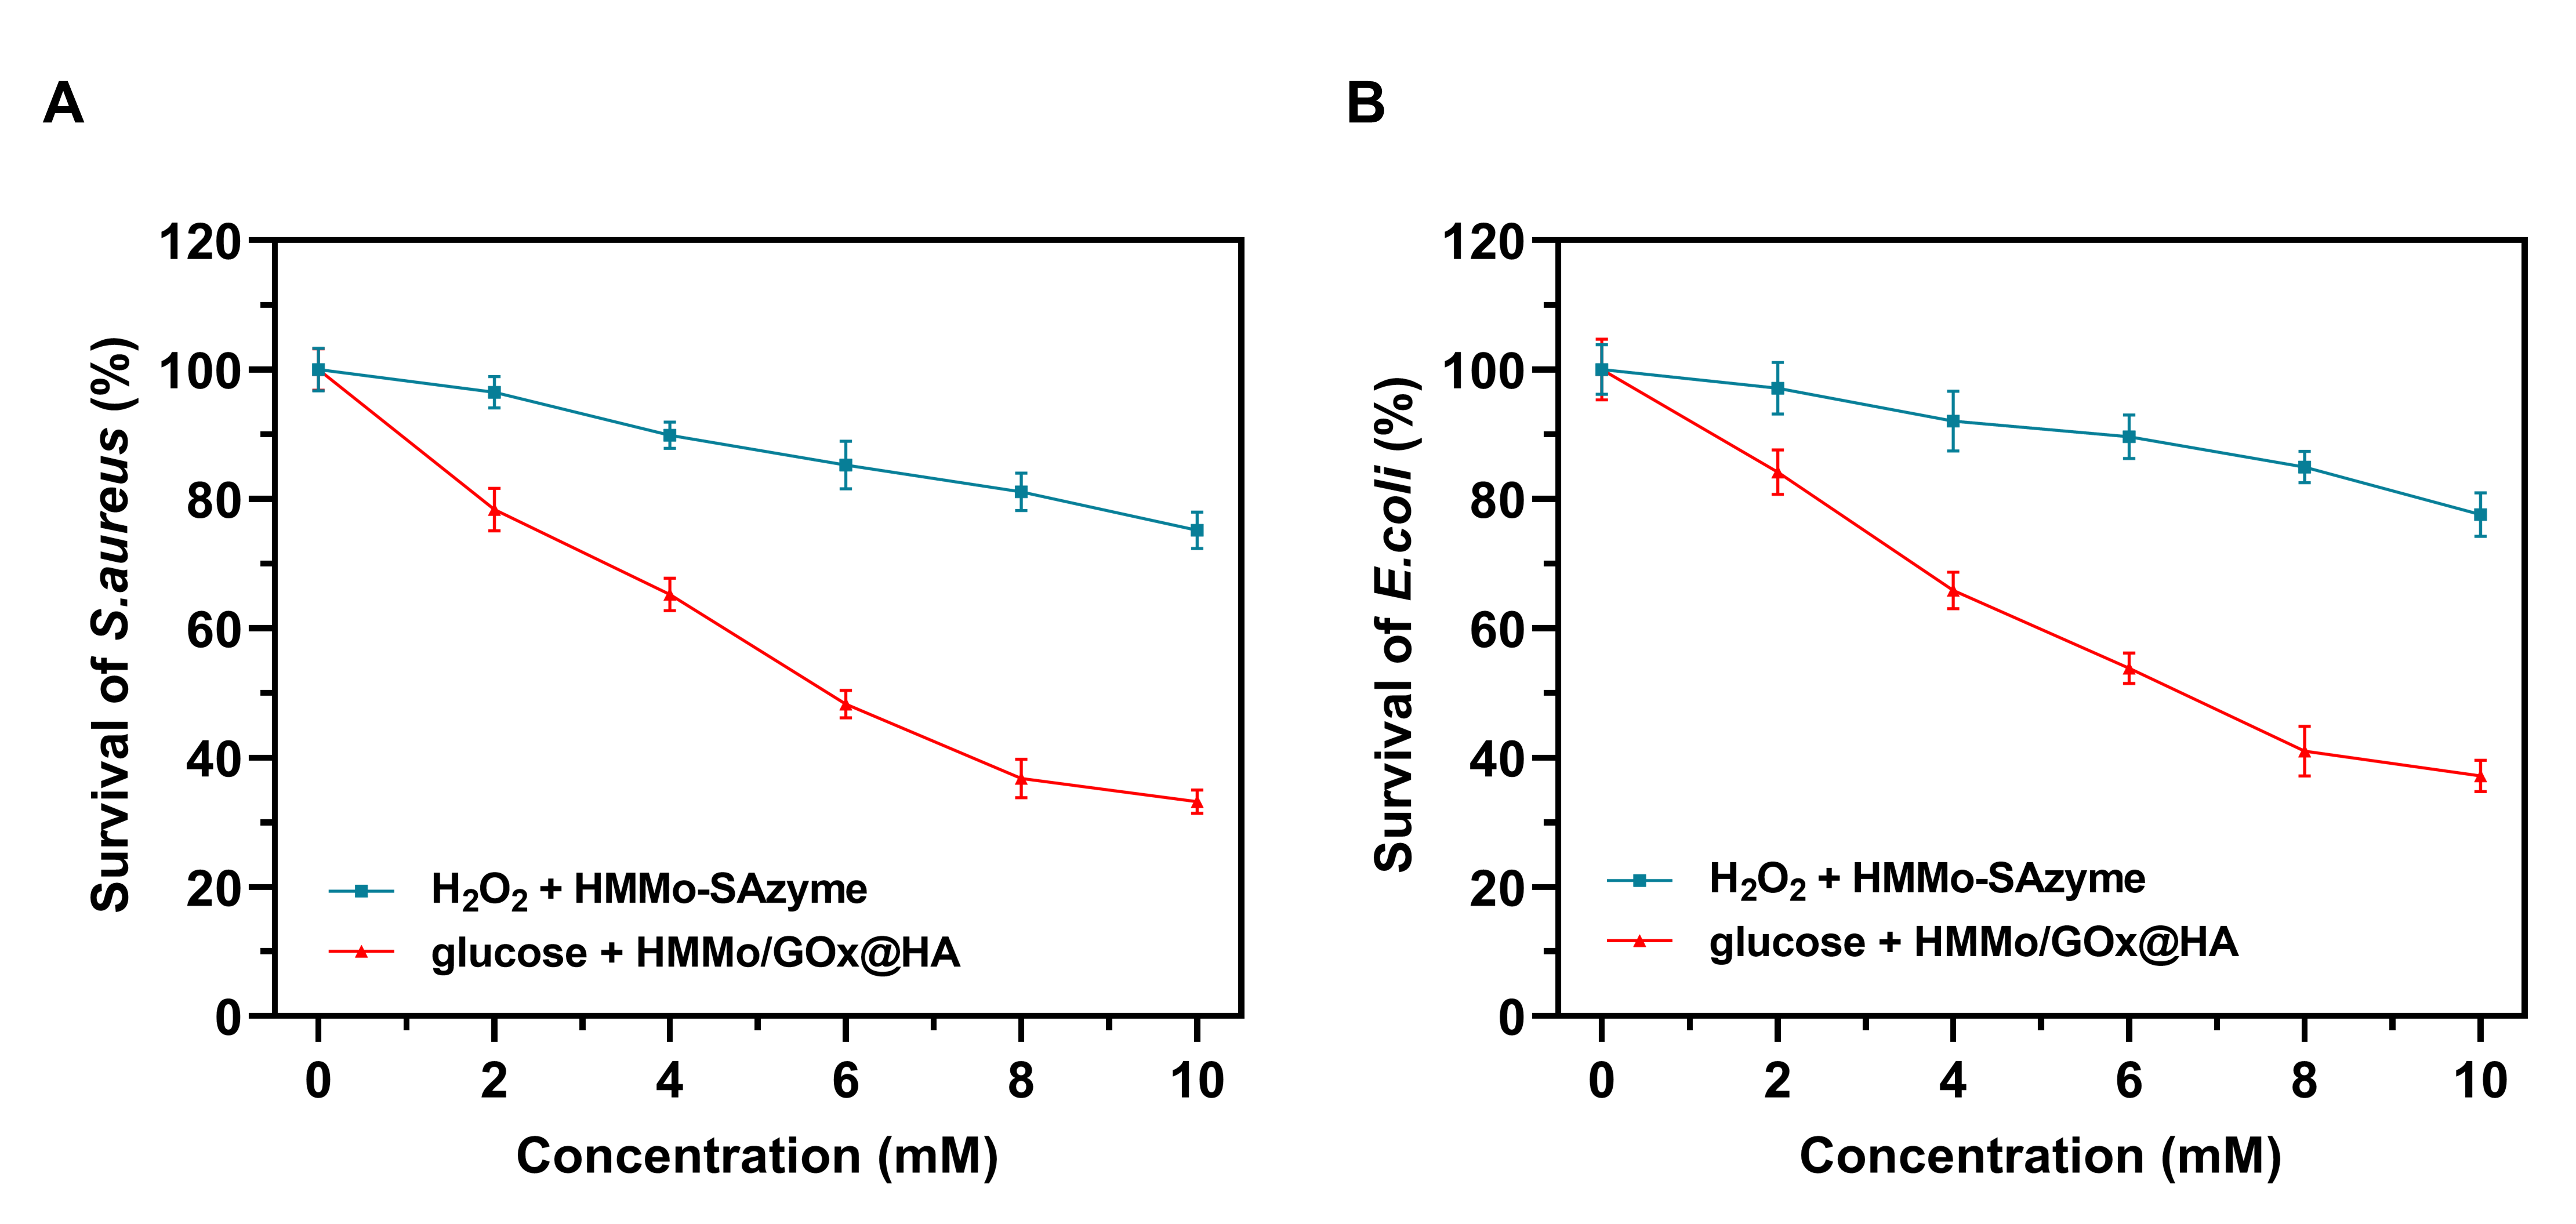
**

**Figure S18.** Comparison of survival rates of (A) *S. aureus* and (B) *E. coli* treated with H2O2 + HMMo-SAzyme or glucose + HMMo/GOx@HA at different concentrations of H2O2 or glucose. Data are shown as mean ± SD.


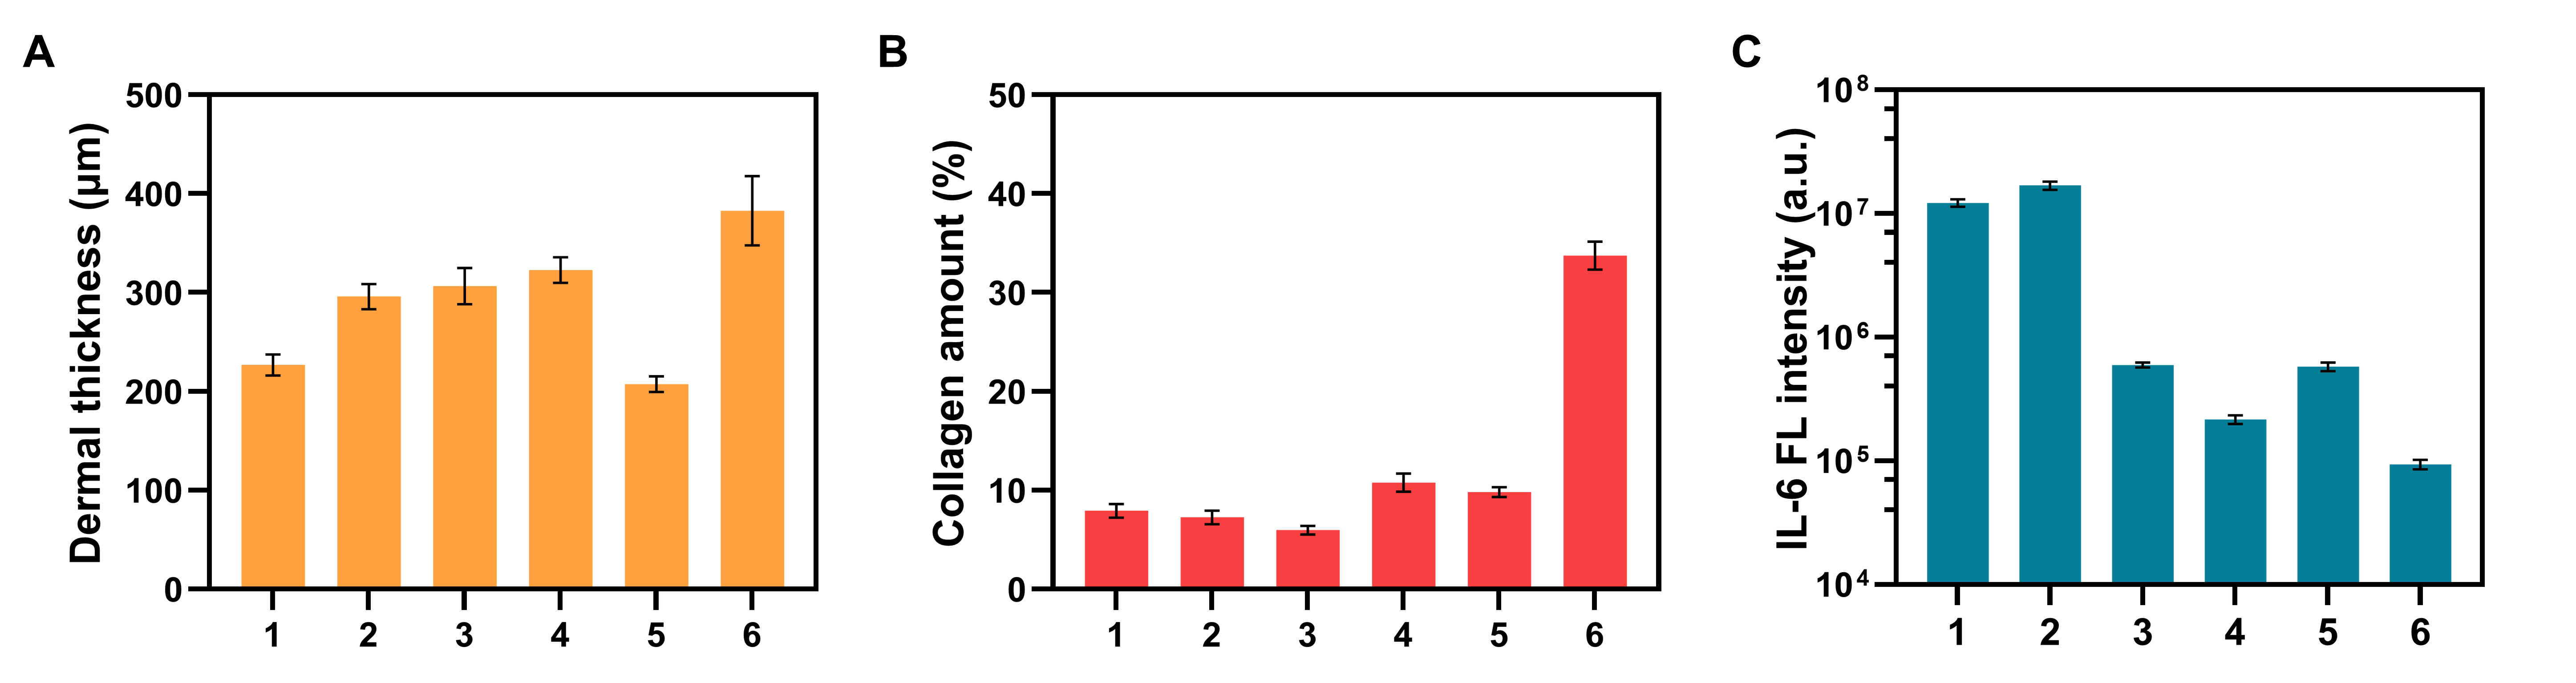


**Figure S19.** (A) Dermal thickness, (B) collagen amount and (C) IL-6 fluorescence intensity of wounds after Differenttreatment: (1) PBS, (2) glucose, (3) HMMo/GOx@HA, (4) glucose + HMMo-SAzyme, (5) glucose + GOx, (6) glucose + HMMo/GOx@HA.

**
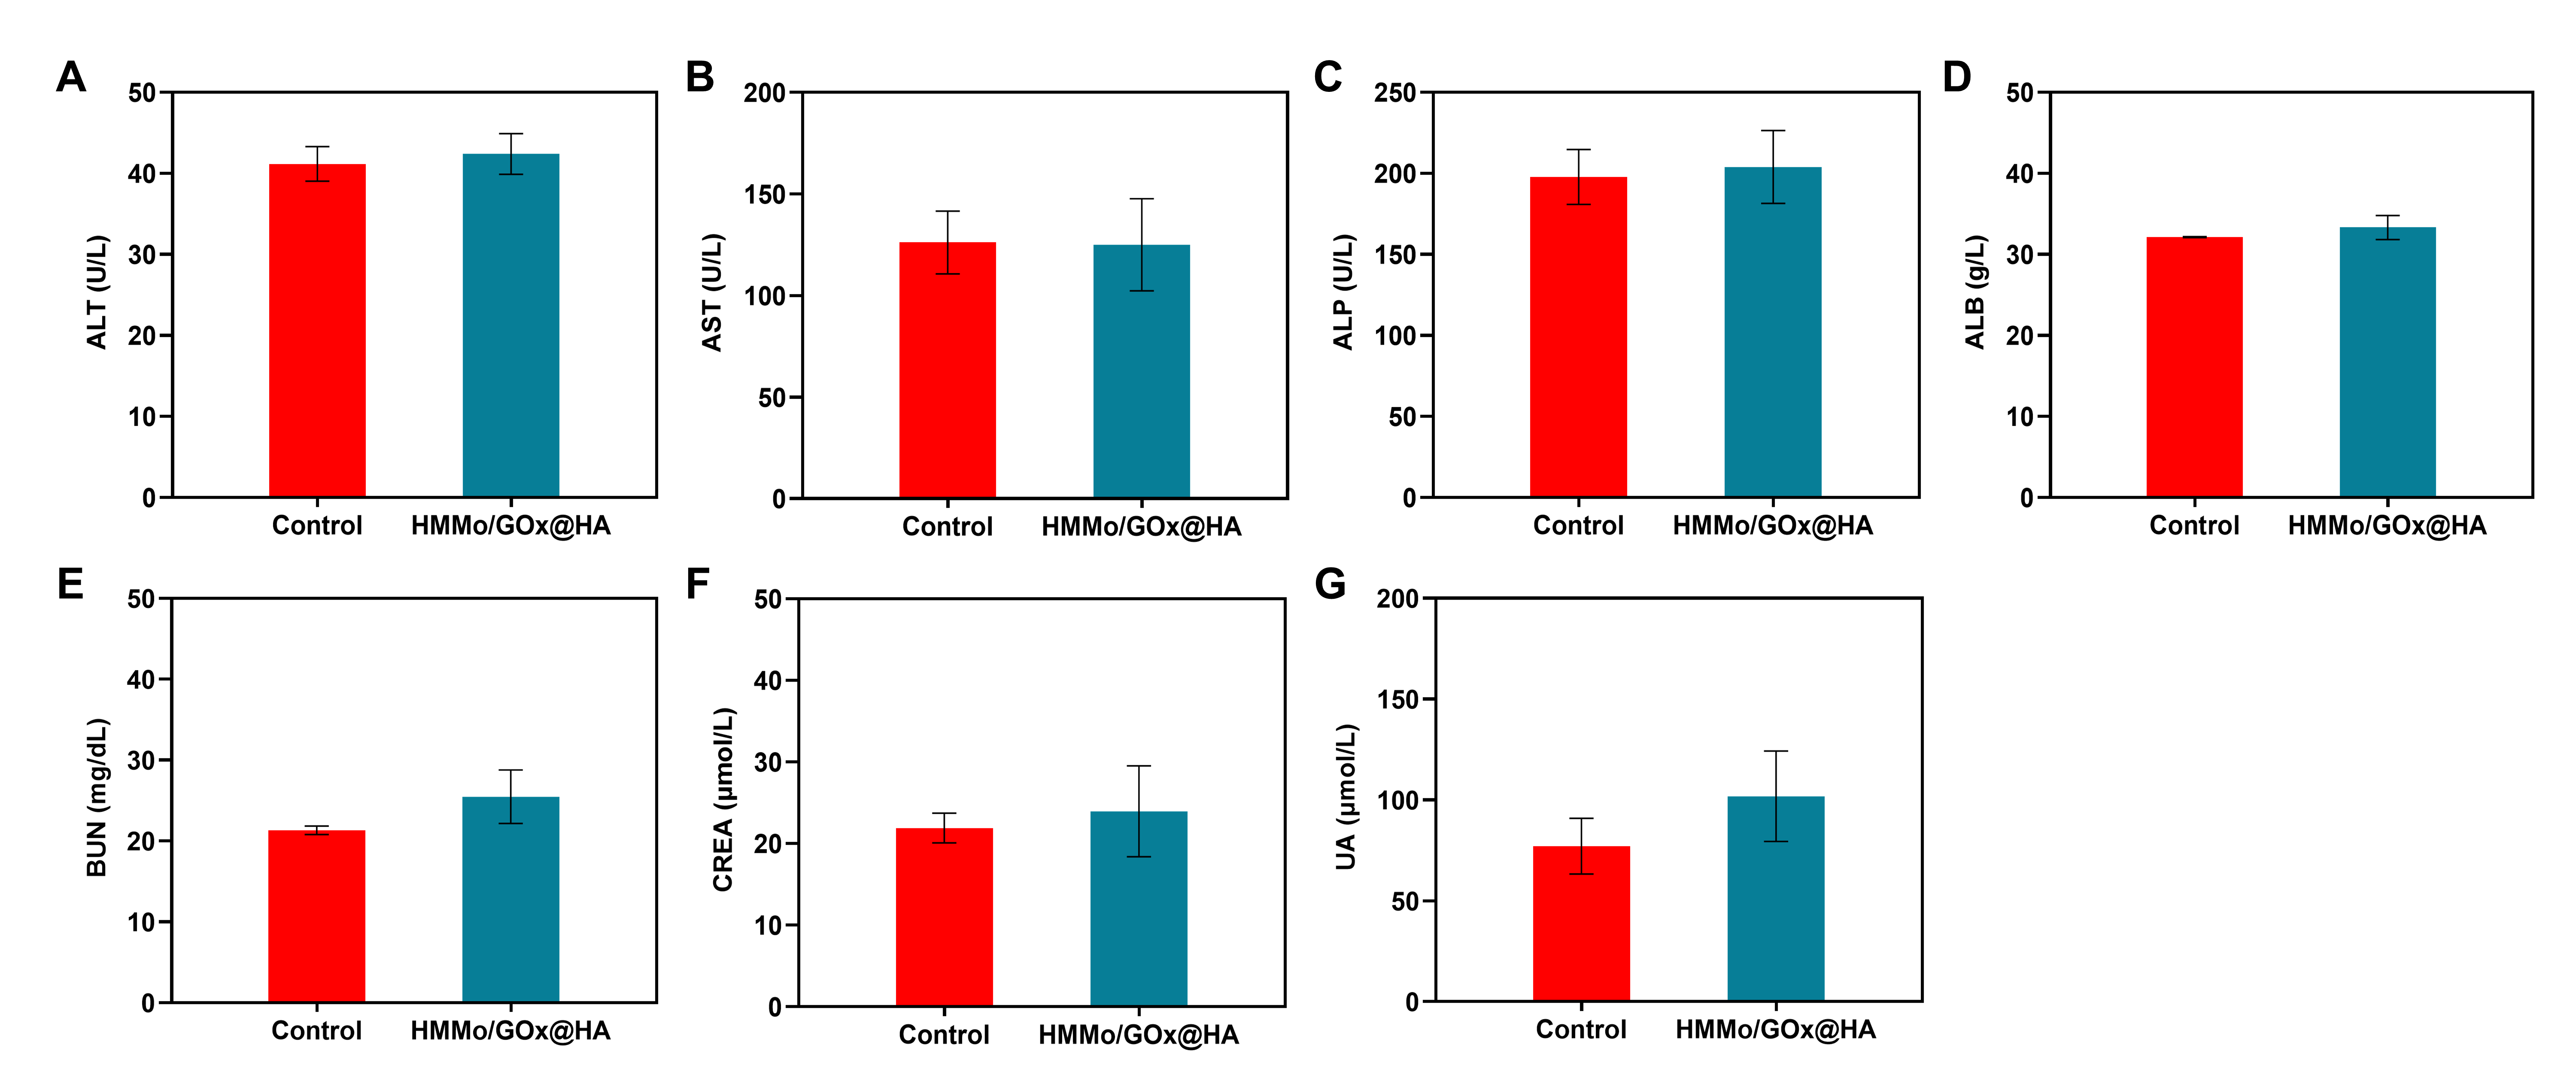
**

**Figure S20.** (A) Alanine aminotransferase, (B) aspartate aminotransferase, (C) alkaline phosphatase, (D) albumin, (E) urea nitrogen, (F) creatinine and (G) uric acid levels of the healthy mice after injection of PBS or HMMo/GOx@HA. Data are shown as mean ± SD.

**Table S1.** Comparison of the kinetic parameters of HMMo-SAzyme and other single-atom nanozymes.

| Catalyst | Substrate | *Km (mM)* | Vmax （M/s） | Reference |
| --- | --- | --- | --- | --- |
| HMMo-SAzyme | H2O2 | 8.46 | 2.66 × 10−7 | This work |
| PMCS | H2O2 | 40.16 | 1.22 × 10-7 | 1 |
| Fe SAEs | H2O2 | 0.24 | 8.25 × 10-8 | 2 |
| Cu-N-C | H2O2 | 19.94 | 2.01 × 10-7 | 3 |
| Pd SAzyme | H2O2 | 1.79 | 1.51 × 10-7 | 4 |
| CNT/FeNC | H2O2 | 0.13 | 1.56 × 10-7 | 5 |
| SAF NCs | H2O2 | 0.01 | 2.34 × 10-7 | 6 |
| Fe SSN | H2O2 | 0.36 | 1.32 × 10-7 | 7 |
| HRP | H2O2 | 3.71 | 8.71 × 10-8 | 8 |

1. Xu B, Wang H, Wang W, et al. A single-atom nanozyme for wound disinfection applications. *Angew Chem Int Ed Engl*. 2019; 58: 4911–4916.
2. Zhao C, Xiong C, Liu X, et al. Unraveling the enzyme-like activity of heterogeneous single atom catalyst. *Chem Commun*. 2019; 55(16): 2285–2288.
3. Wu Y, Wu J, Jiao L, et al. Cascade reaction system integrating single-atom nanozymes with abundant Cu sites for enhanced biosensing. *Anal Chem*. 2020; 92(4): 3373–3379.
4. Chang M, Hou Z, Wang M, et al. Single-atom Pd nanozyme for ferroptosis-boosted mild-temperature photothermal therapy. *Angew Chem Int Ed Engl*. 2021; 60(23): 12971–12979.
5. Cheng N, Li JC, Liu D, Lin Y, Du D. Single-atom nanozyme based on nanoengineered Fe-N-C catalyst with superior peroxidase-like activity for ultrasensitive bioassays. *Small*. 2019; 15(48): 1901485–1901491.
6. Huo M, Wang L, Zhang H, Zhang L, Chen Y, Shi J. Construction of single-iron-atom nanocatalysts for highly efficient catalytic antibiotics. *Small*. 2019; 15(31): 1901834–1901843.
7. Chen M, Zhou H, Liu X, et al. Single iron site nanozyme for ultrasensitive glucose detection. *Small*. 2020; 16(31): 2002343–2002348.
8. Gao L, Zhuang J, Nie L, et al. Intrinsic peroxidase-like activity of ferromagnetic nanoparticles. *Nat Nanotechnol*. 2007 ;2(9): 577-583.
